# Supplementary material for: An Efficient Microarray-Based Genotyping Platform for the Identification of Drug-Resistance Mutations in Majority and Minority Subpopulations of HIV-1 Quasispecies
Source: PubMed Central journal article supplement (PMC5154500; doi:10.1371/journal.pone.0166902), 2016-12-13
Supplement: pone.0166902.s001.pdf [file pone.0166902.s001.pdf]

**An efficient microarray-based genotyping platform for the identification  
of drug-resistance mutations in majority and minority subpopulations  
of HIV-1 quasispecies**

***S1 File: Supporting information***

Verónica Martín<sup>1,#a</sup>, Celia Perales<sup>1,2,3</sup>, María Fernández-Algar<sup>4</sup>, Helena G. Dos Santos<sup>1,#b</sup>, Patricia Garrido<sup>5,#c</sup>, María Pernas<sup>5,#d</sup>, Víctor Parro<sup>4</sup>, Miguel Moreno<sup>4</sup>, Javier García-Pérez<sup>6</sup>, José Alcamí<sup>6</sup>, José Luis Torán<sup>5,#e</sup>, David Abia<sup>1</sup>, Esteban Domingo<sup>1,2</sup>, Carlos Briones<sup>2,4,\*</sup>.

<sup>1</sup> Centro de Biología Molecular ‘Severo Ochoa’ (CBMSO, CSIC-UAM). Campus de Cantoblanco, 28049 Madrid, Spain.

<sup>2</sup> Centro de Investigación Biomédica en Red de enfermedades hepáticas y digestivas (CIBERehd), Spain.

<sup>3</sup> Liver Unit, Internal Medicine, Laboratory of Malalties Hepàtiques, Vall d’Hebron Institut de Recerca-Hospital Universitari Vall d’Hebron (VHIR-HUVH), Universitat Autònoma de Barcelona. 08035 Barcelona, Spain.

<sup>4</sup> Department of Molecular Evolution, Centro de Astrobiología (CAB, CSIC-INTA). 28850 Torrejón de Ardoz, Madrid, Spain.

<sup>5</sup> Biotherapix, SLU. Parque Tecnológico de Madrid, 28760 Tres Cantos, Madrid. Spain.

<sup>6</sup> AIDS Immunopathogenesis Unit, Instituto de Salud Carlos III. 28220 Majadahonda, Madrid, Spain.

<sup>#a</sup>Current Address: Centro de Investigación en Sanidad Animal (CISA), Instituto Nacional de Investigación y Tecnología Agraria y Alimentaria (INIA). 28130 Valdeolmos, Madrid, Spain.

<sup>#b</sup>Current Address: Department of Biological Sciences, Florida International University. Miami, FL 33199, USA.

<sup>#c</sup>Current Address: Sygnis Biotech. Parque Científico de Madrid. Campus de Cantoblanco, 28049 Madrid, Spain.

<sup>#d</sup>Current Address: Instituto de Salud Carlos III. 28220 Majadahonda, Madrid, Spain.

<sup>#e</sup>Current Address: Spanish National Center for Biotechnology (CNB, CSIC). Campus de Cantoblanco, 28049 Madrid, Spain.

\* Corresponding author

E-mail: [cbriones@cab.inta-csic.es](mailto:cbriones@cab.inta-csic.es)

**Figure A. Scheme of the HIV-1 genotyping microarray and examples of the hybridization signals produced by wild type target DNA molecules.** (a) Position of the 360 spots printed on each of the four subarrays of the microarray. Discriminating probes are shown in black, positive HIV-1 internal hybridization controls (IHC-PR3, IHC-PR4, IHC-RT3 and IHC-RT4) are depicted in green, negative controls (C-:FMDV-G142-15r and C-:FMDV-E142-15r, corresponding to sequences of the foot-and-mouth disease virus VP1 coding region) appear in red and additional negative controls including spotting solution (C-) are shown in grey. Yellow background highlights the probes complementary to wild type sequences for each queried codon. The highly performing probes that were maintained after the quality control protocol (see main text) are underlined. Further details on the probe sequences are given in Supp. Table S1. Rows 1-4 contain the PR-specific probes and rows 5-15 the RT ones. (b) and (c) Examples of microarray images corresponding to the hybridization of PR and RT targets with wild type sequences, using ScanArray and GenePix microarray scanners (see Methods), respectively.

a)

|    | A                            | B                      | C                      | D                            | E                            | F                      | G                      | H                      | I                      | J                      | K                       | L                            |
|----|------------------------------|------------------------|------------------------|------------------------------|------------------------------|------------------------|------------------------|------------------------|------------------------|------------------------|-------------------------|------------------------------|
| 1  | IHC-PR3<br>• •               | IHC-PR4<br>• •         | <u>R8-PR-2</u><br>• •  | <u>Q8-PR-2</u><br>• •        | <u>D30-PR</u><br>• •         | N30-PR<br>• •          | <u>M36-PR</u><br>• •   | I36-PR<br>• •          | <u>M46b-PR</u><br>• •  | <u>M46c-PR</u><br>• •  | <u>F46-PR</u><br>• •    | <u>I46-PR</u><br>• •         |
| 2  | <u>L46-PR</u><br>• •         | <u>V46-PR</u><br>• •   | <u>G48-PR</u><br>• •   | <u>V48-PR</u><br>• •         | <u>I50-PR</u><br>• •         | L50a-PR<br>• •         | <u>L50b-PR</u><br>• •  | <u>V50-PR-2</u><br>• • | <u>I54-PR</u><br>• •   | <u>V54-PR-2</u><br>• • | <u>A71-PR-2</u><br>• •  | <u>V71-PR-2</u><br>• •       |
| 3  | <u>V82b-PR-2</u><br>• •      | <u>A82-PR-2</u><br>• • | <u>F82-PR-2</u><br>• • | <u>I82-PR-2</u><br>• •       | <u>S82-PR-2</u><br>• •       | <u>T82-PR-2</u><br>• • | <u>I84-PR-2</u><br>• • | <u>A84-PR-2</u><br>• • | <u>V84-PR-2</u><br>• • | <u>L90a-PR</u><br>• •  | <u>L90a-PR-2</u><br>• • | <u>I90-PR</u><br>• •         |
| 4  | I90-PR-2<br>• •              | M90-PR<br>• •          | <u>M90-PR-2</u><br>• • | C-: FMDV-<br>G142-15r<br>• • | C-: FMDV-<br>E142-15r<br>• • | C-<br>• •              | C-<br>• •              | C-<br>• •              | C-<br>• •              | C-<br>• •              | IHC-PR3<br>• •          | IHC-PR4<br>• •               |
| 5  | IHC-RT3<br>• •               | IHC-RT4<br>• •         | <u>M41</u><br>• •      | <u>L41a</u><br>• •           | L41b<br>• •                  | <u>A62</u><br>• •      | <u>V62</u><br>• •      | <u>K65-2</u><br>• •    | <u>R65-3</u><br>• •    | <u>D67a-2</u><br>• •   | <u>D67b-2</u><br>• •    | <u>E67-2</u><br>• •          |
| 6  | <u>G67</u><br>• •            | <u>G67-2</u><br>• •    | <u>N67-2</u><br>• •    | <u>Del67</u><br>• •          | <u>S68</u><br>• •            | <u>N68</u><br>• •      | <u>T69b</u><br>• •     | <u>T69c</u><br>• •     | <u>A69</u><br>• •      | <u>D69</u><br>• •      | <u>G69</u><br>• •       | <u>S69a</u><br>• •           |
| 7  | <u>S69b</u><br>• •           | <u>S69R70</u><br>• •   | Ins69a<br>• •          | <u>Ins69b</u><br>• •         | <u>Ins69c</u><br>• •         | <u>Ins69d</u><br>• •   | <u>Ins69e</u><br>• •   | <u>Ins69f</u><br>• •   | <u>Ins69g</u><br>• •   | <u>Ins69h</u><br>• •   | <u>Ins69i</u><br>• •    | <u>Ins69j</u><br>• •         |
| 8  | <u>Ins69k</u><br>• •         | <u>Ins69l</u><br>• •   | <u>K70a</u><br>• •     | <u>K70b</u><br>• •           | <u>E70</u><br>• •            | N70a<br>• •            | <u>N70b</u><br>• •     | R70a<br>• •            | <u>R70b</u><br>• •     | <u>L74</u><br>• •      | <u>V74-2</u><br>• •     | <u>V75</u><br>• •            |
| 9  | <u>I75</u><br>• •            | <u>T75</u><br>• •      | <u>F77</u><br>• •      | <u>L77</u><br>• •            | <u>L100-2</u><br>• •         | <u>I100-2</u><br>• •   | <u>K101-3</u><br>• •   | <u>E101-3</u><br>• •   | <u>K103a-2</u><br>• •  | <u>K103c-2</u><br>• •  | <u>N103-3</u><br>• •    | <u>R103-3</u><br>• •         |
| 10 | <u>V106-2</u><br>• •         | <u>A106-2</u><br>• •   | <u>I106-2</u><br>• •   | <u>L106-2</u><br>• •         | <u>V108-2</u><br>• •         | <u>I108-2</u><br>• •   | <u>F116</u><br>• •     | <u>Y116-3</u><br>• •   | <u>Q151-2</u><br>• •   | <u>M151-2</u><br>• •   | <u>I178</u><br>• •      | <u>M178</u><br>• •           |
| 11 | <u>V179-2</u><br>• •         | <u>D179-2</u><br>• •   | <u>E179-2</u><br>• •   | <u>Y181</u><br>• •           | <u>C181</u><br>• •           | <u>H181</u><br>• •     | <u>I181</u><br>• •     | <u>L181</u><br>• •     | <u>M184a</u><br>• •    | <u>M184b</u><br>• •    | <u>I184</u><br>• •      | <u>T184</u><br>• •           |
| 12 | <u>V184b</u><br>• •          | <u>Y188a</u><br>• •    | <u>Y188c</u><br>• •    | <u>C188-2</u><br>• •         | <u>H188</u><br>• •           | L188a<br>• •           | <u>L188b</u><br>• •    | <u>G190</u><br>• •     | <u>A190</u><br>• •     | <u>E190</u><br>• •     | <u>Q190</u><br>• •      | <u>S190</u><br>• •           |
| 13 | <u>T190</u><br>• •           | <u>L210-3</u><br>• •   | <u>W210-2</u><br>• •   | <u>R211-2</u><br>• •         | <u>K211-2</u><br>• •         | <u>T215a-2</u><br>• •  | <u>T215b-2</u><br>• •  | <u>C215-2</u><br>• •   | <u>F215-2</u><br>• •   | <u>S215-2</u><br>• •   | <u>Y215-2</u><br>• •    | <u>K219</u><br>• •           |
| 14 | <u>K219-2</u><br>• •         | <u>E219</u><br>• •     | <u>Q219</u><br>• •     | <u>P225-2</u><br>• •         | <u>H225-2</u><br>• •         | <u>M230-3</u><br>• •   | <u>L230-3</u><br>• •   | <u>P236-2</u><br>• •   | <u>L236-2</u><br>• •   | <u>K238</u><br>• •     | <u>T238</u><br>• •      | C-: FMDV-<br>G142-15r<br>• • |
| 15 | C-: FMDV-<br>E142-15r<br>• • | C-<br>• •              | C-<br>• •              | C-<br>• •                    | C-<br>• •                    | C-<br>• •              | C-<br>• •              | C-<br>• •              | C-<br>• •              | C-<br>• •              | IHC-RT3<br>• •          | IHC-RT4<br>• •               |

b)

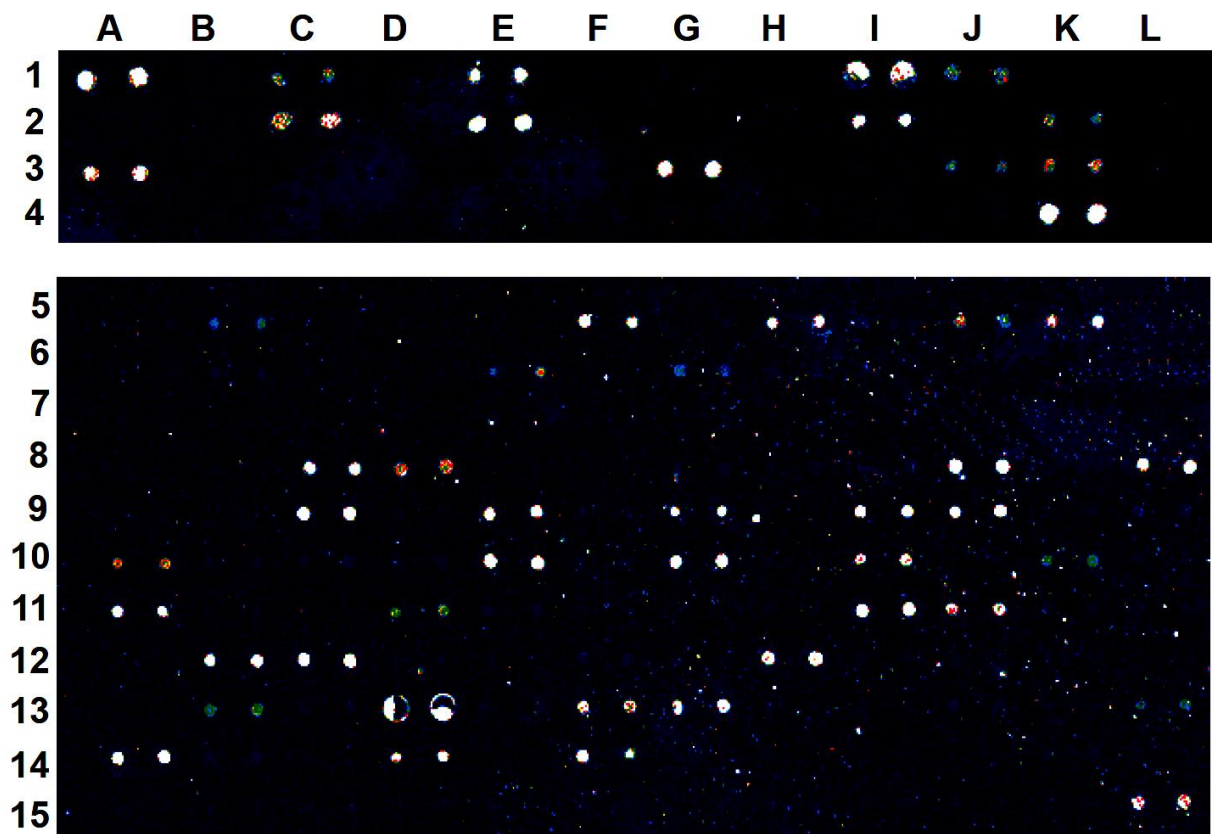

c)

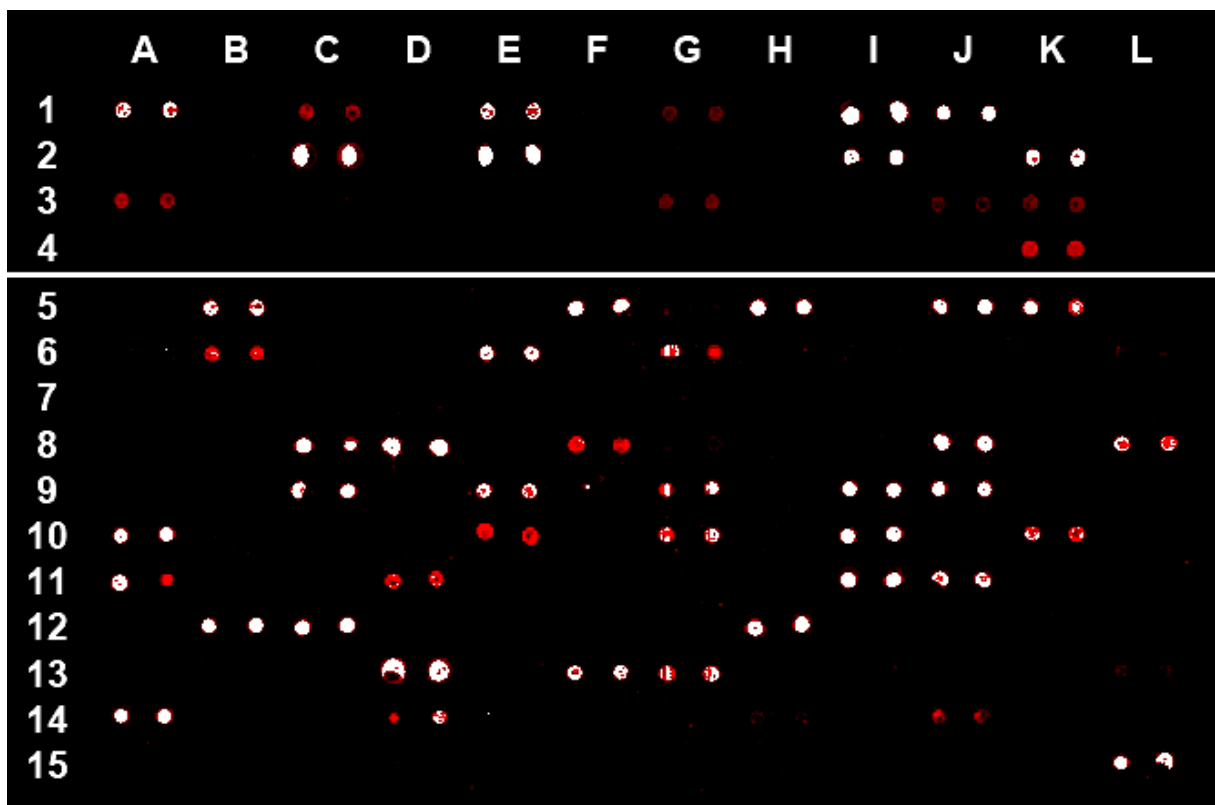

**Figure B. Examples of the hybridization results of different PR and RT targets including drug resistance mutations and insertions.** (a) Discrimination of mutants in the HIV-1 PR: I36, I46, L46, V48, V54, V71, T82, V84, M90+M90-2 (highlighted in red). (b) Discrimination of mutant and insert-containing targets of the HIV-1 RT: V62, S68, S69, Ins69a, Ins69b, Ins69c, Ins69d, I75, T75, I100, E101, I108, M151, M178, C181, I184, H188, K211, Y215, C215 and T238. The whole set of raw microarray hybridization data used in this study has been uploaded to Gene Expression Omnibus (GEO) repository (<https://www.ncbi.nlm.nih.gov/geo/>), with the accession number GSE90621.

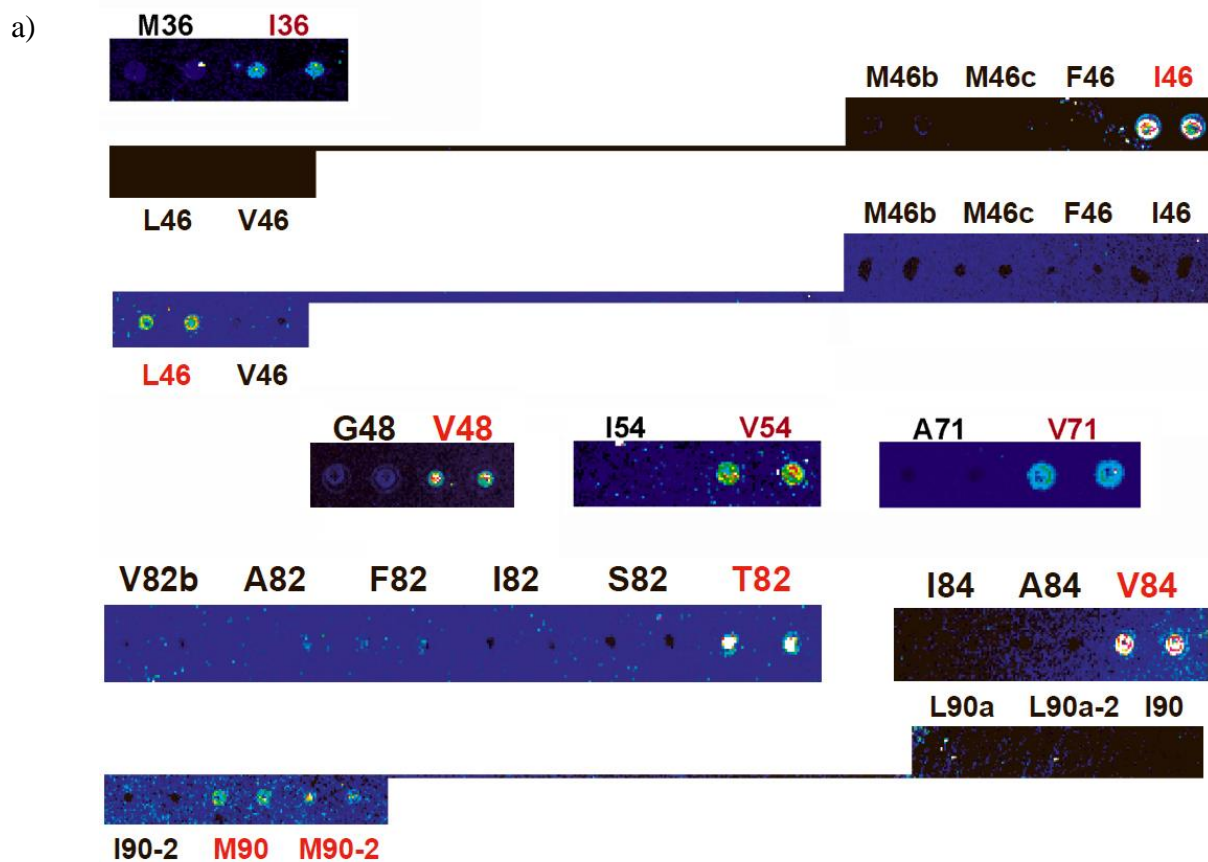

b)

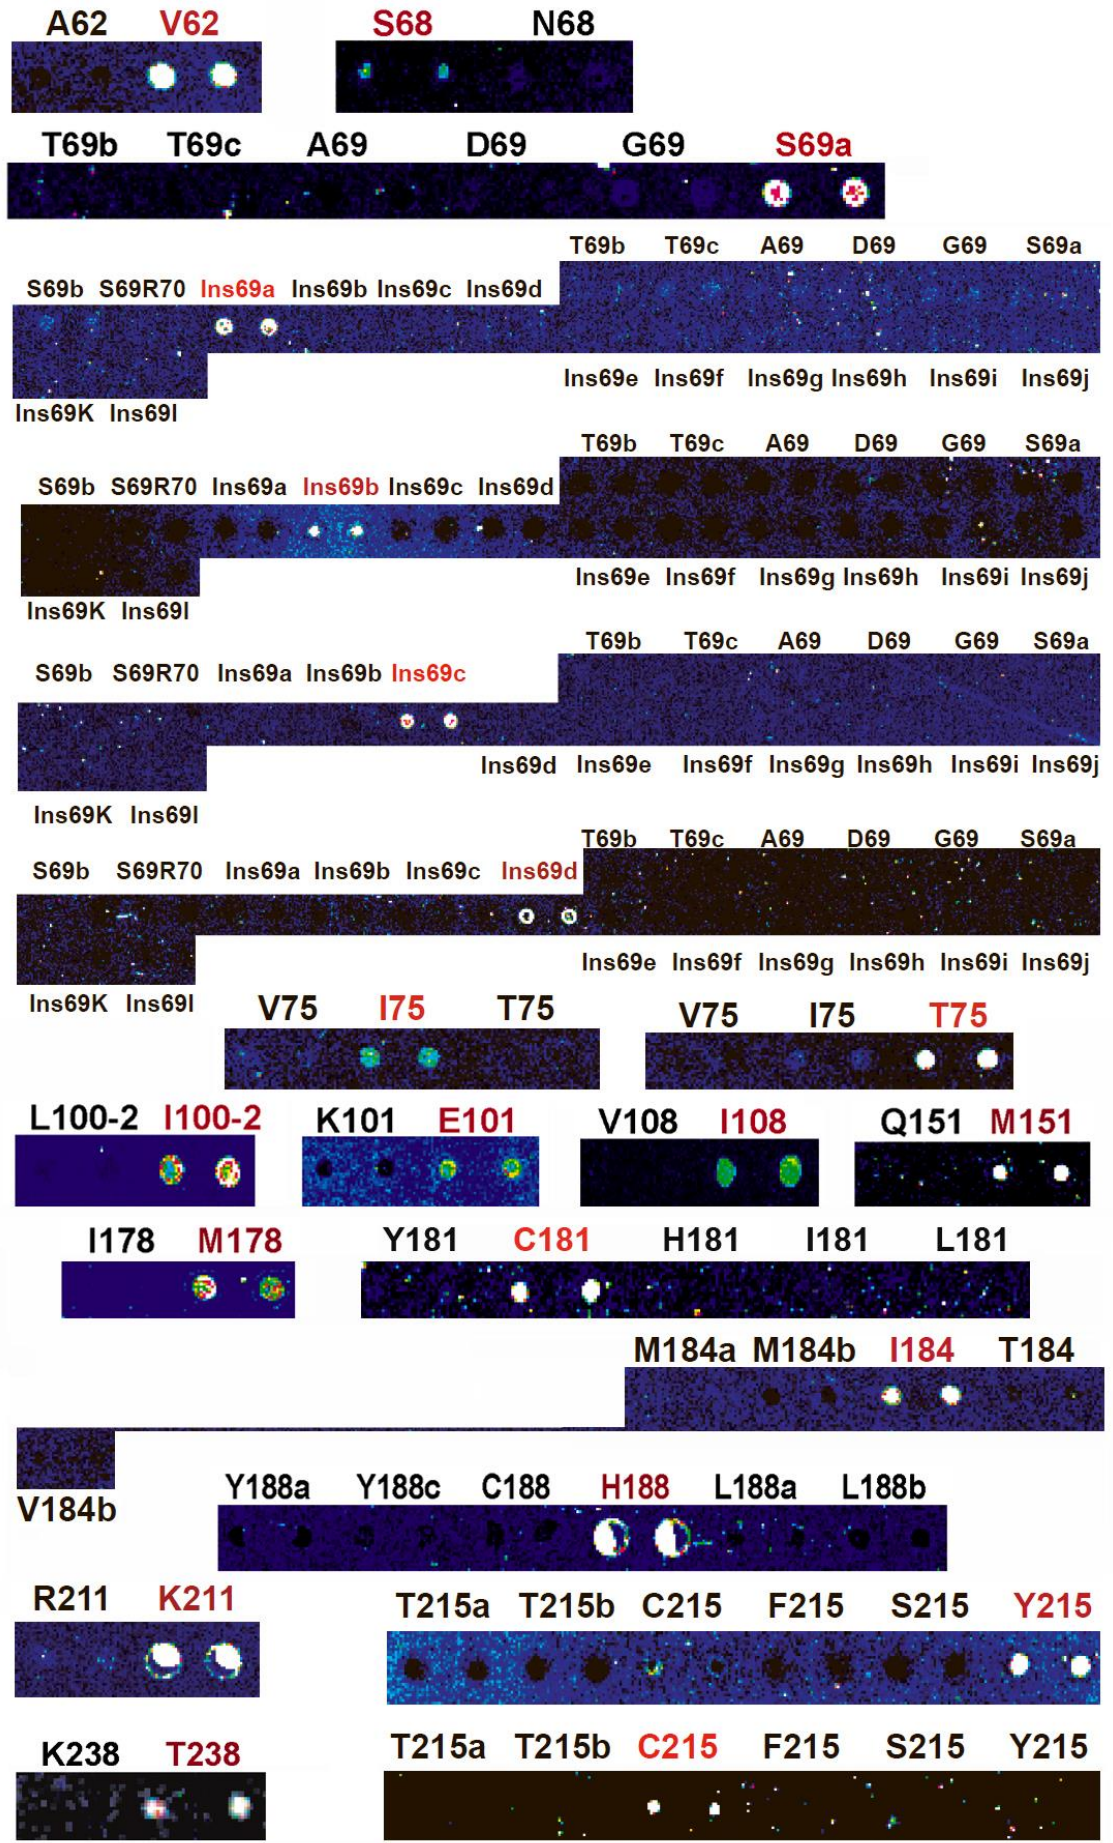

**Figure C. Examples of the hybridization results produced by different RT targets belonging to the clinical samples of the test set that contained majority and minority variants.** Positive signals in the microarray are highlighted in red. The theoretical percentage of signals at each probe position, derived from the analysis of clonal sequences (13 to 34 clones per sample) is shown below the hybridization signals. Different situations have been chosen to exemplify either concordant or discrepant results between the hybridization signals and their expected percentage derived from clonal analysis (discrepant percentages are depicted in grey). The sequencing electropherograms corresponding to the population sequence are also shown, together with the derived amino acid(s) assumed to be present at the interrogating codon.

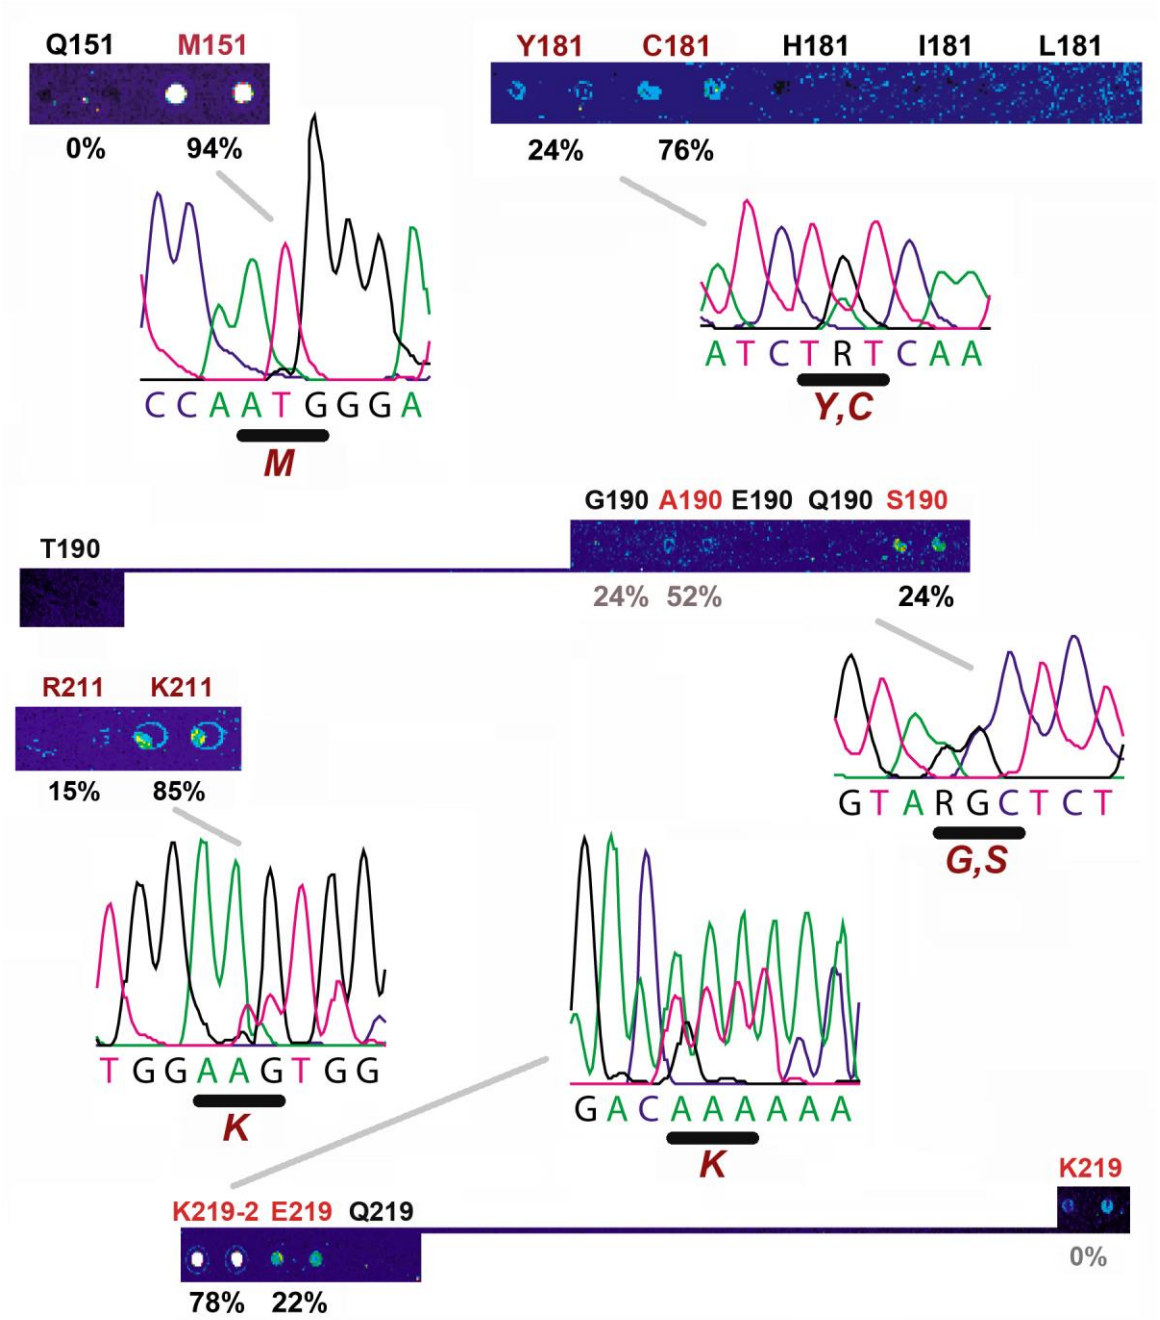





b)

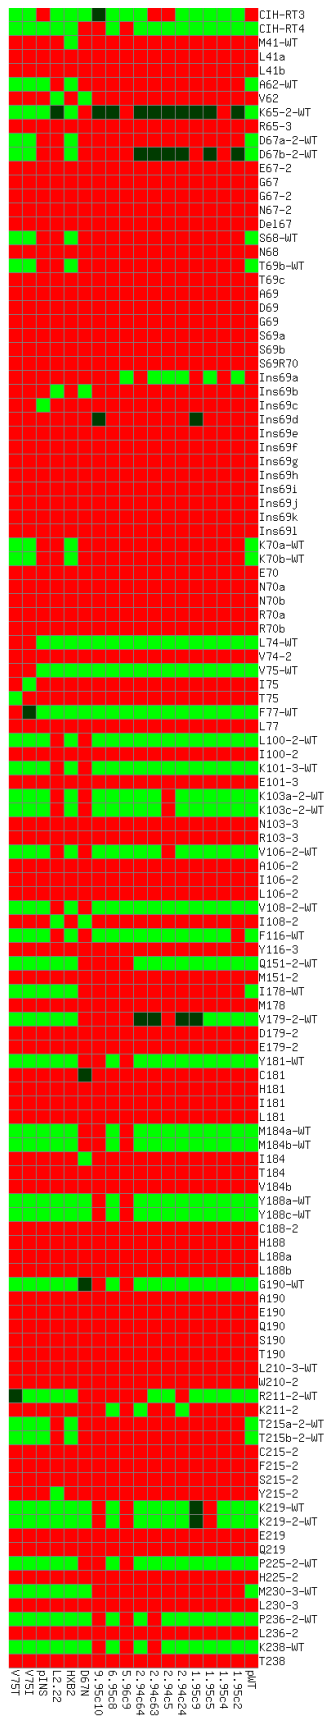

**Figure E. Density of the raw hybridization data for three key variables quantified by *GenePix* and *ScanArray* scanners.** The threshold values are shown with dotted lines. Color code: Green, true positive (TP) signal; Red, false positive (FP); Blue, true negative (TN); Black, false negative (FN).

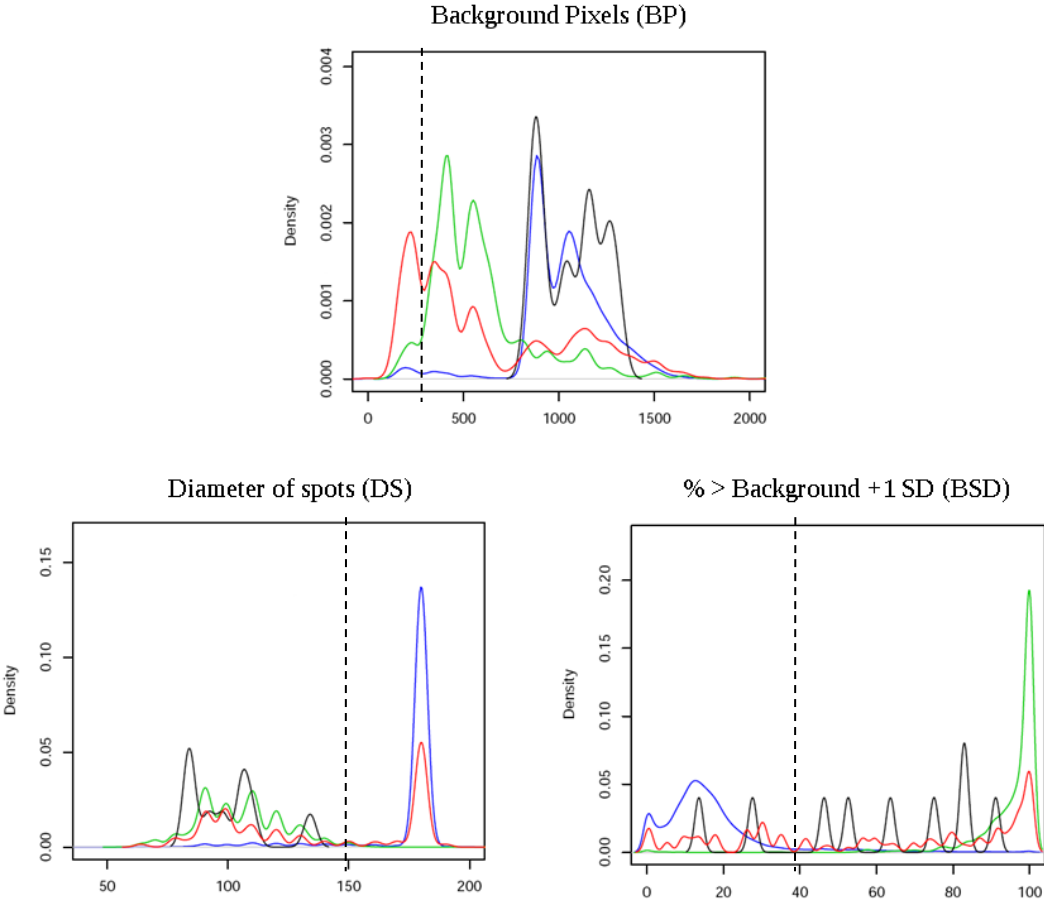

**Figure F. Test of the normalization performance of data from the training set.** a) Density of positive and negative raw fluorescence data. b) Normalized fluorescence data using the mean positive signal of each array region (RT or RT): distributions of positive signals are centred in value 1 of normalized intensity, while distributions of negative signals are close to zero. Color code: Red, density of negative hybridization data; Blue, fit to a log-normal distribution of negative data; Black, density of positive hybridization data; Green, fit to a normal distribution of positive data.

a)

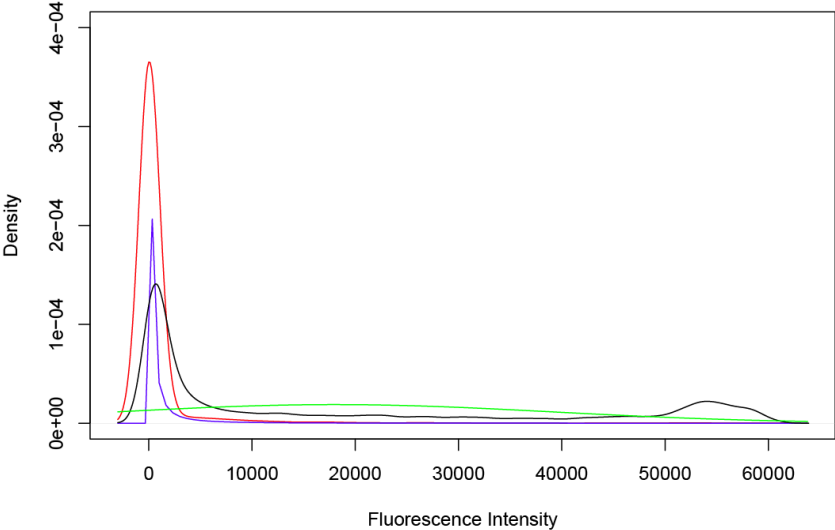

b)

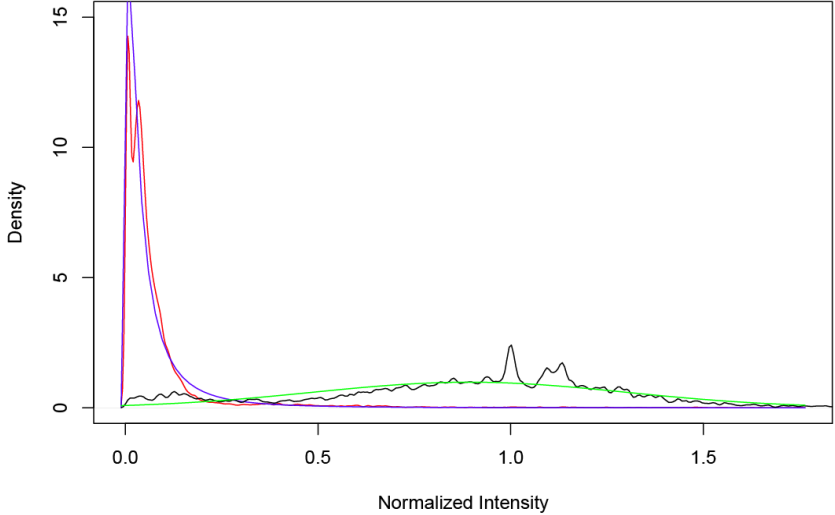

**Figure G. Probe-specific curves for the 124 spotted probes that passed the quality control.** Density of normalized hybridization signals from the training set with their fitted distribution functions for positive and negative data. Color code: see Supp. Fig S6.

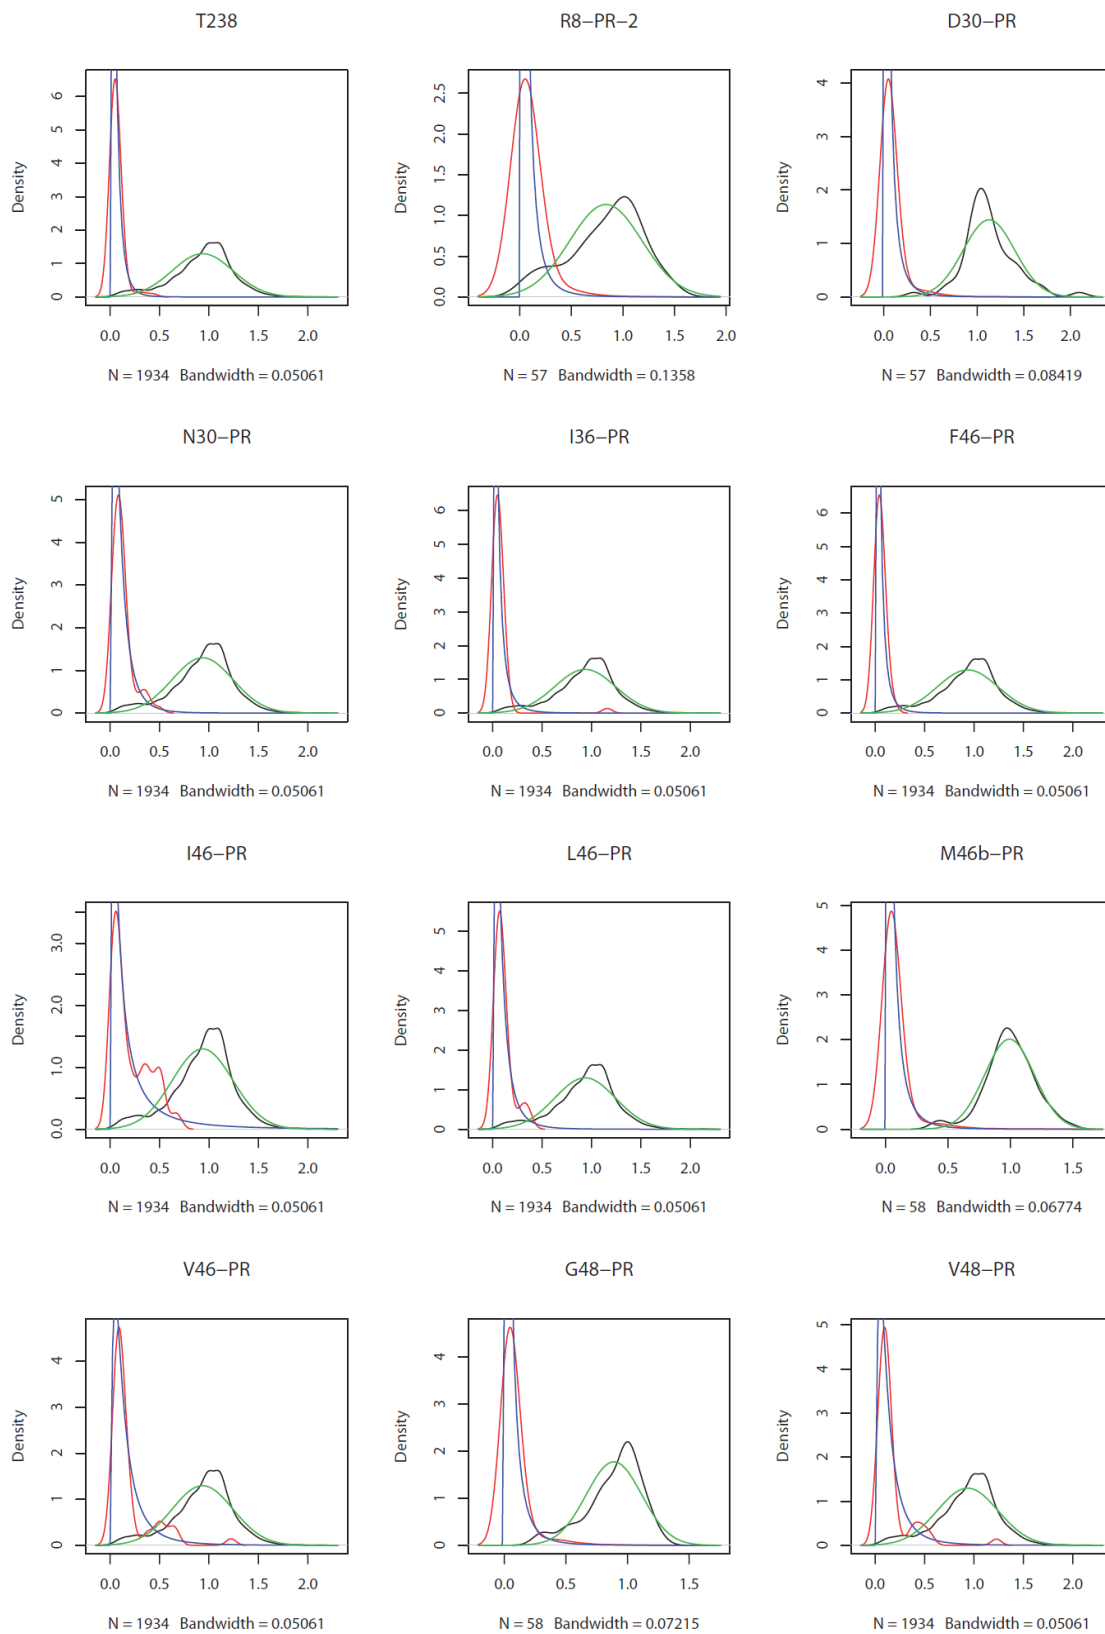

I50-PR

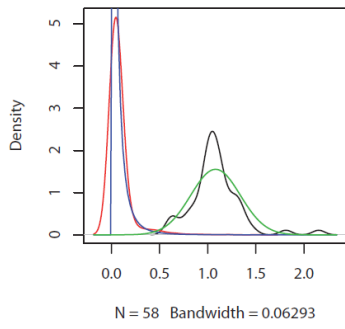

L50b-PR

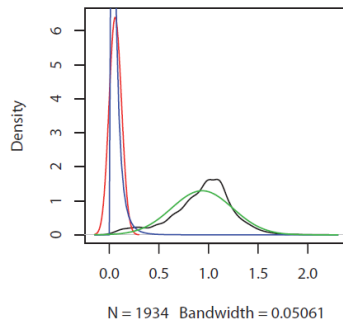

V50-PR-2

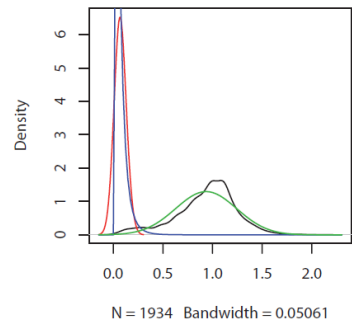

I54-PR

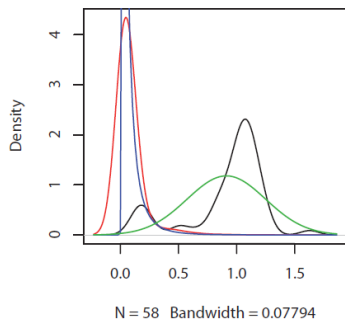

V54-PR-2

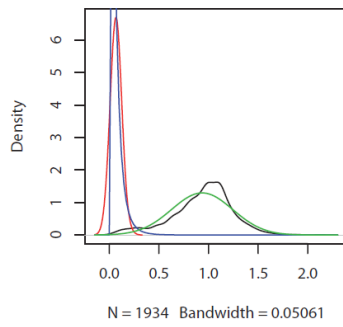

V71-PR-2

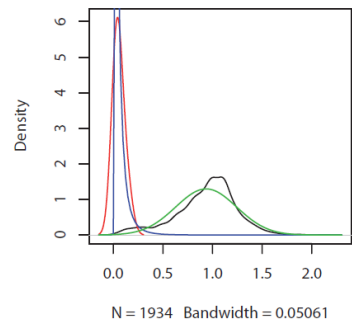

A82-PR-2

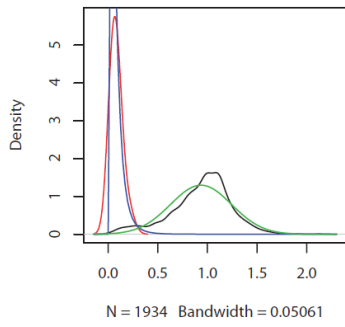

F82-PR-2

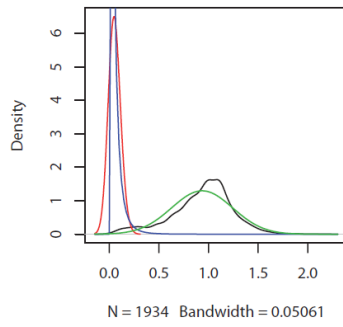

I82-PR-2

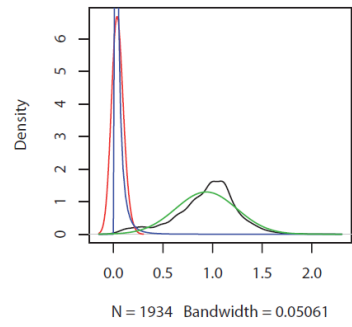

S82-PR-2

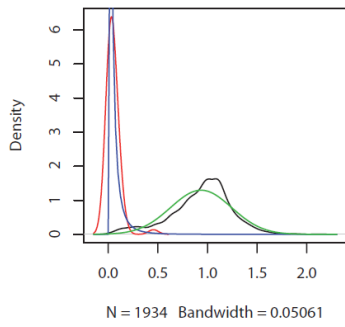

T82-PR-2

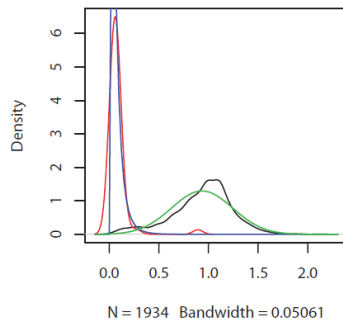

V82b-PR-2

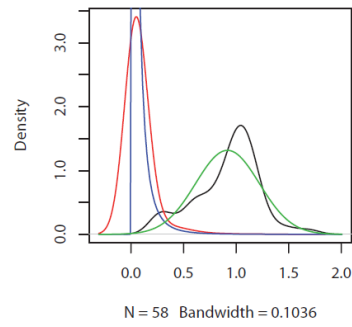

A84-PR-2

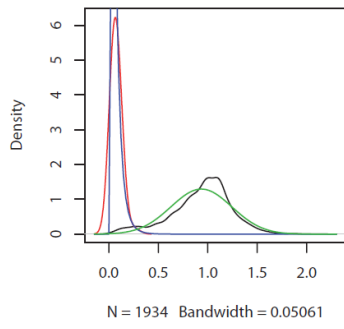

I84-PR-2

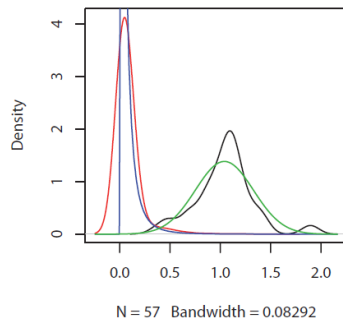

V84-PR-2

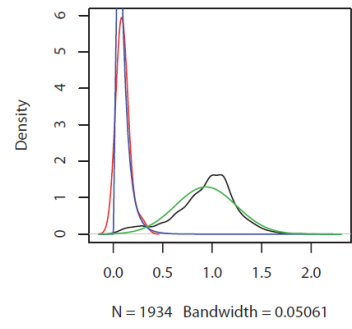

I90-PR

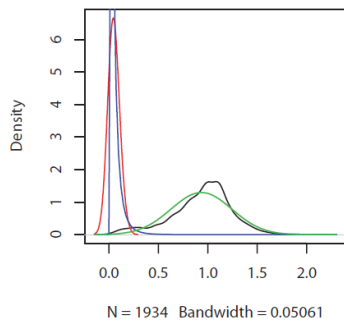

M90-PR-2

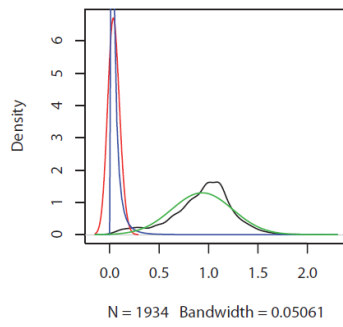

L41a

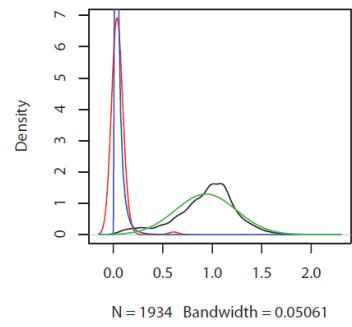

M41

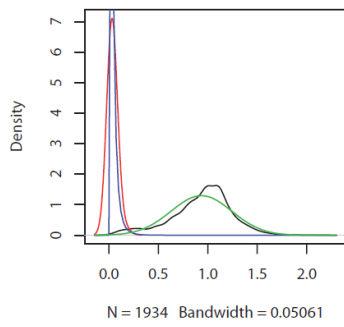

A62

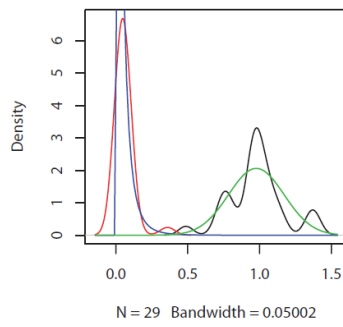

V62

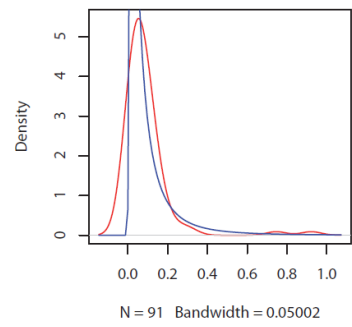

K65-2

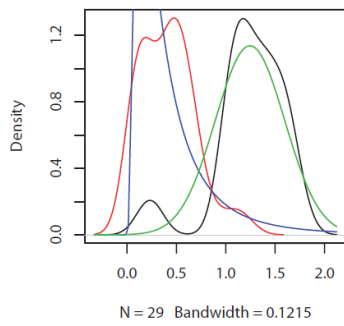

R65-3

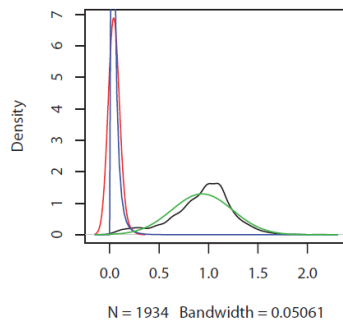

D67a-2

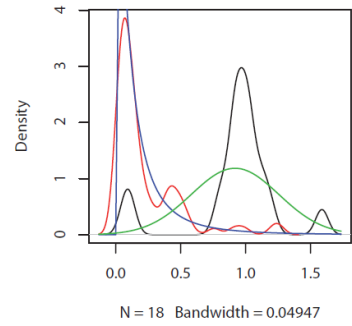



Ins69b

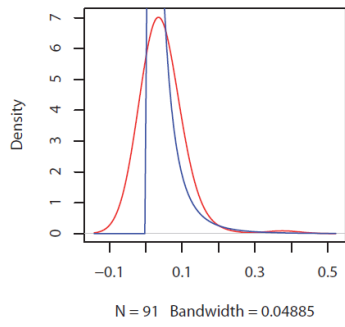

Ins69c

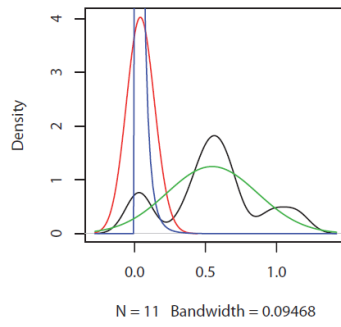

Ins69d

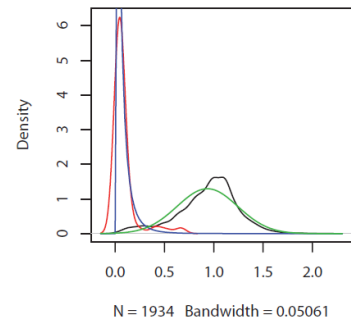

Ins69e

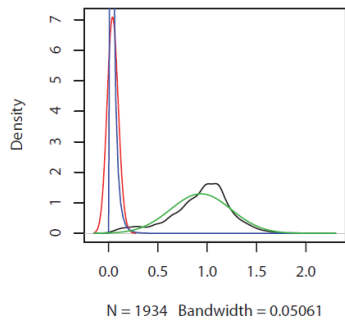

Ins69f

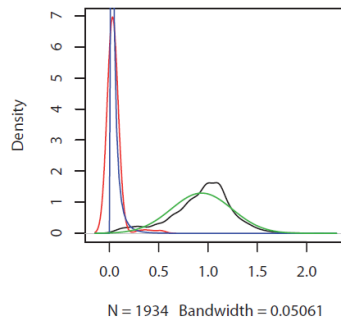

Ins69g

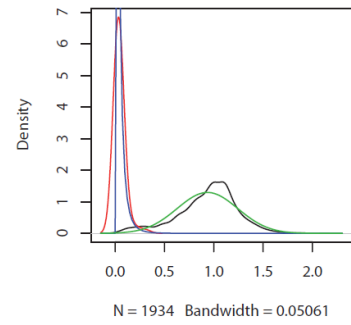

Ins69h

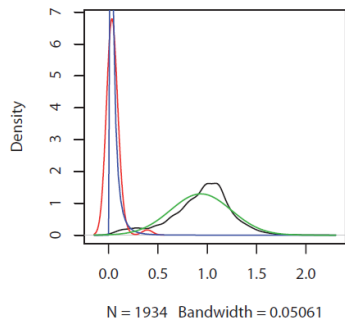

Ins69i

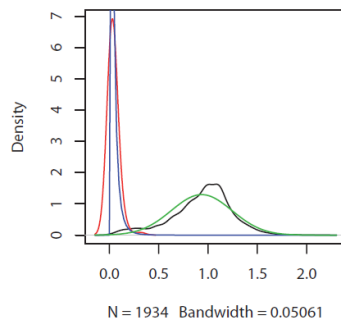

Ins69j

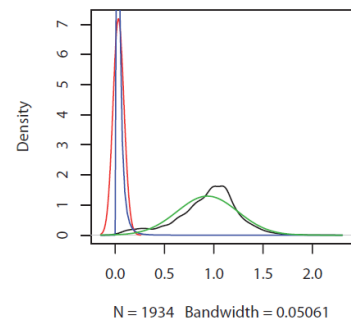

Ins69k

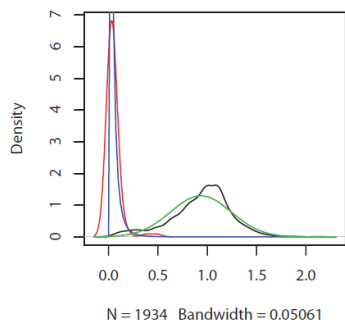

Ins69l

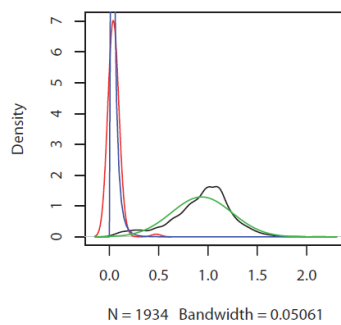

E70

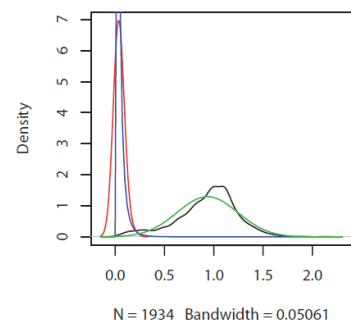



K70a

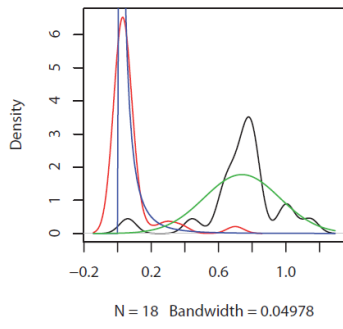

N70b

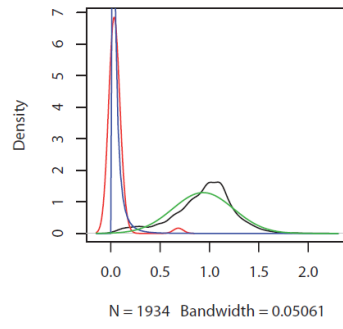

R70b

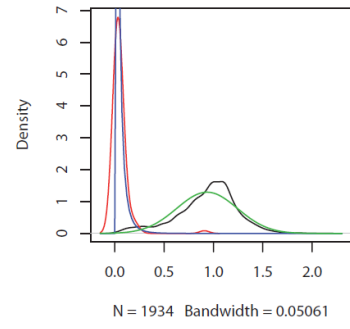

L74

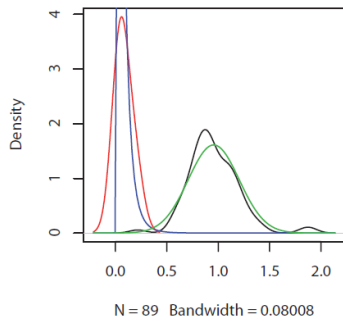

V74-2

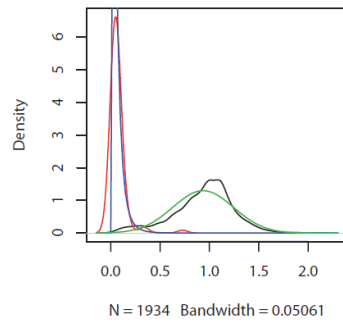

I75

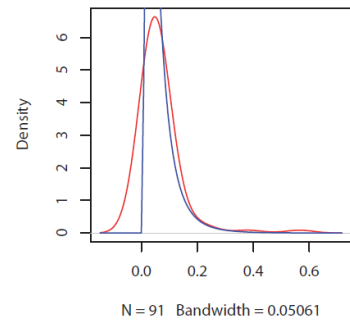

T75

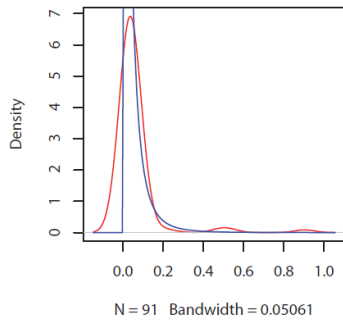

V75

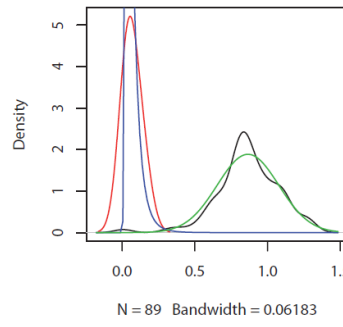

F77

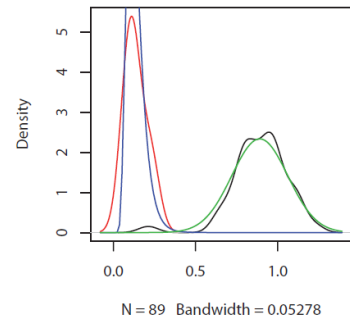

L77

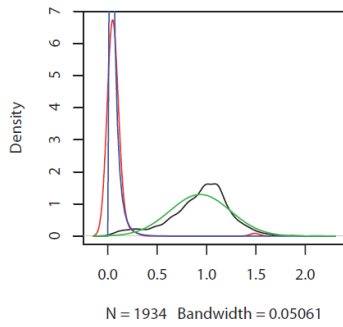

I100-2

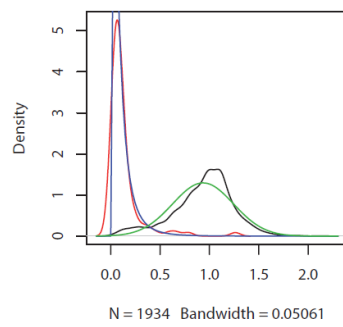

L100-2

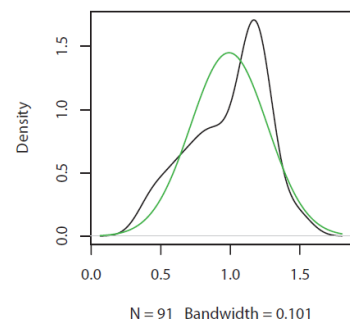

E101-3

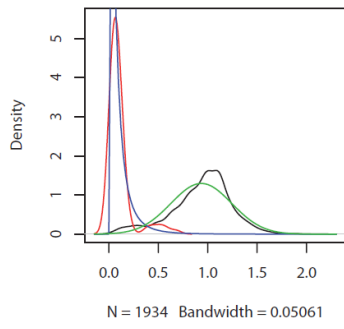

K103a-2

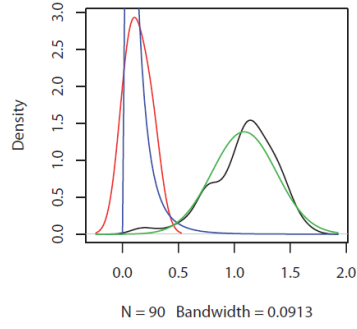

N103-3

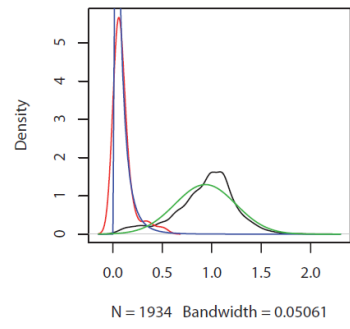

R103-3

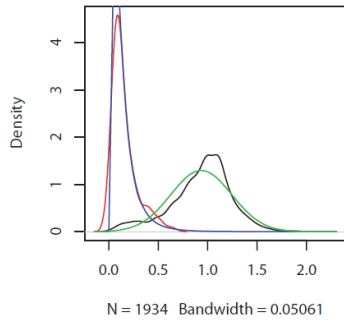

A106-2

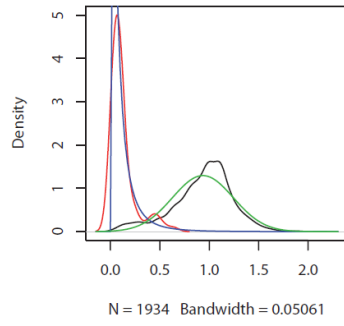

I106-2

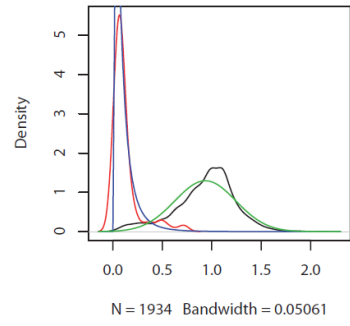

L106-2

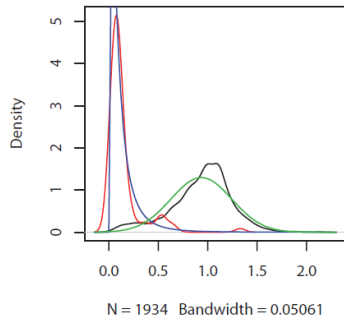

V106-2

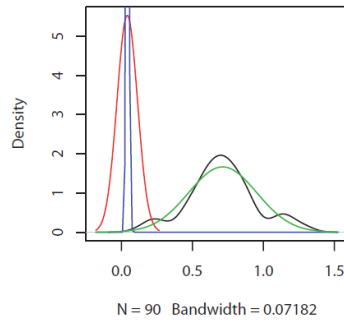

I108-2

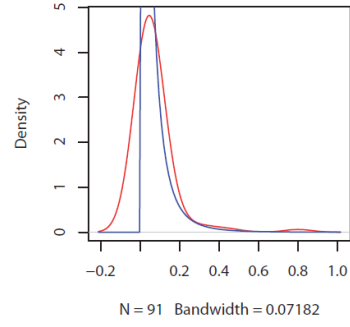

V108-2

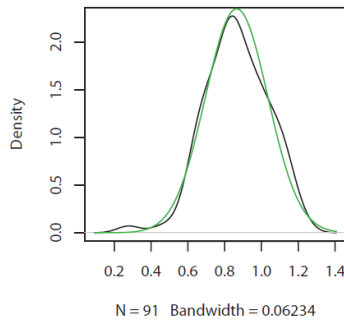

F116

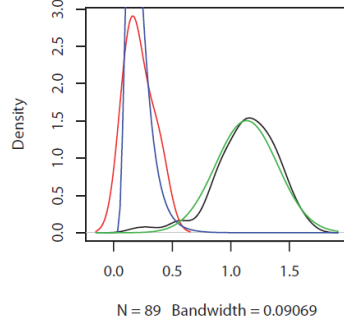

Y116-3

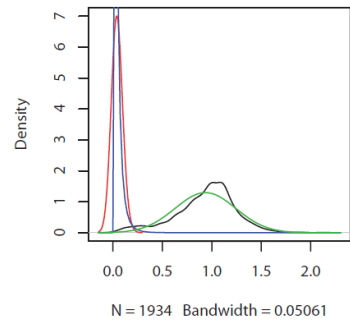

M151-2

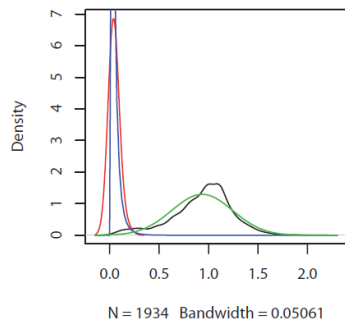

Q151-2

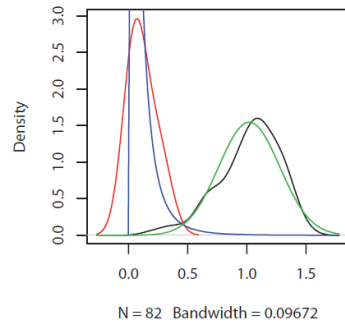

I178

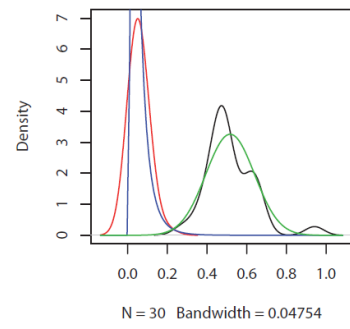

M178

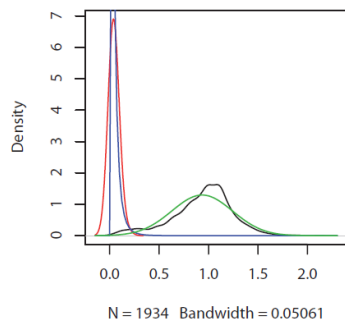

D179-2

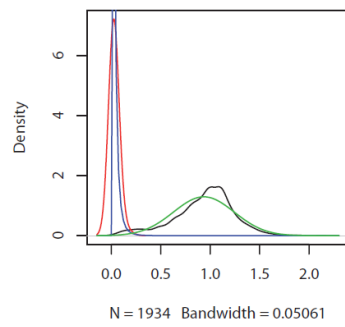

E179-2

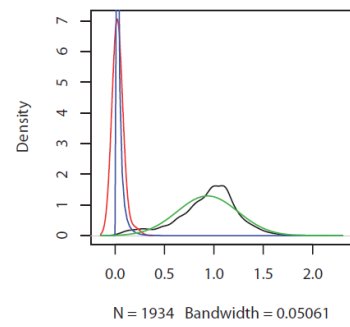

C181

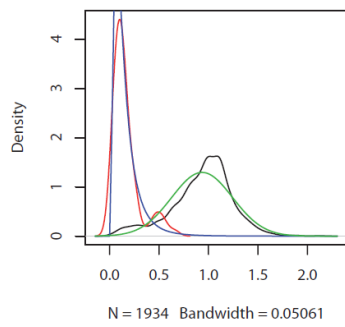

H181

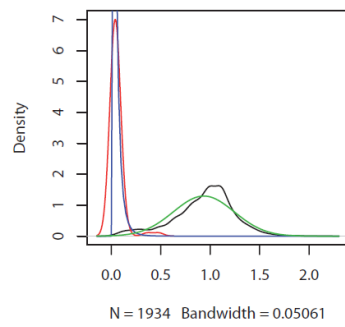

I181

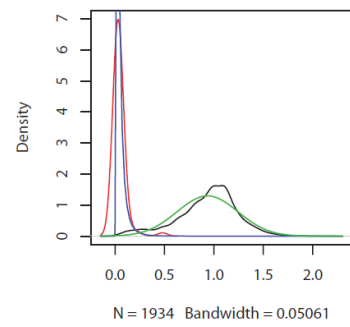

L181

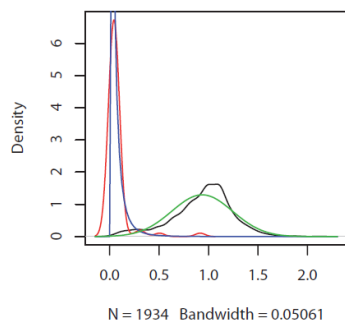

Y181

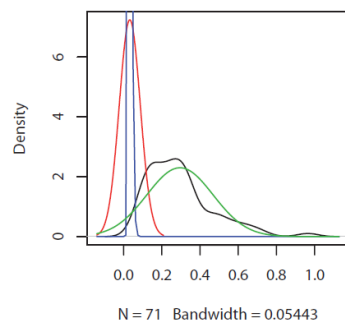

I184

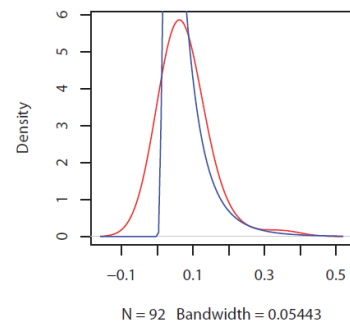

M184a

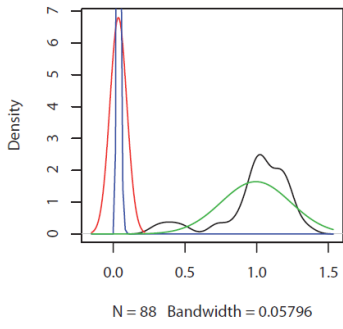

T184

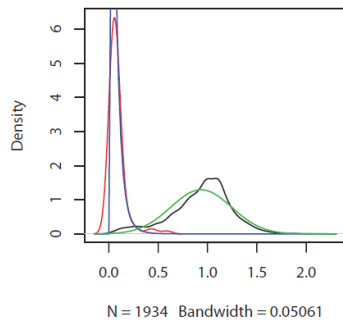

V184b

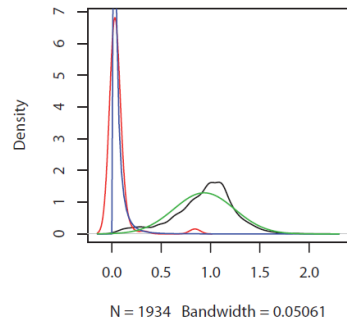

C188-2

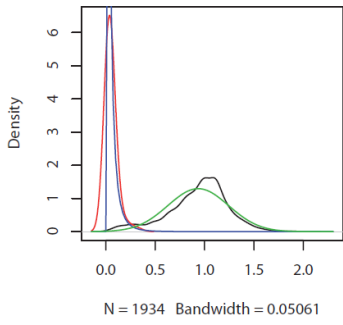

H188

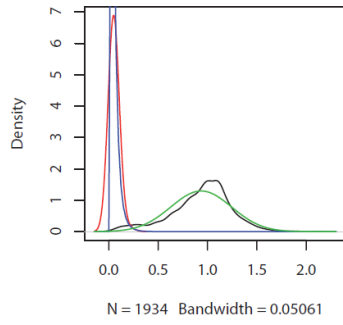

L188b

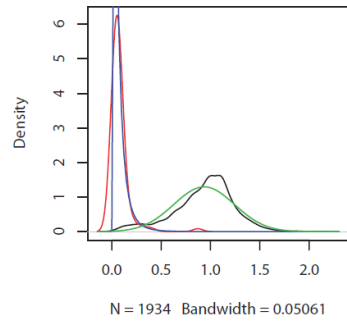

Y188a

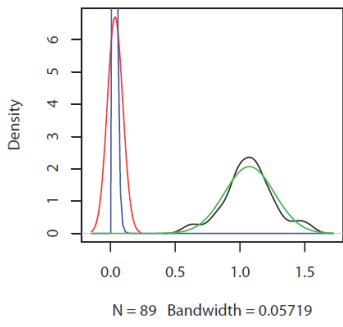

A190

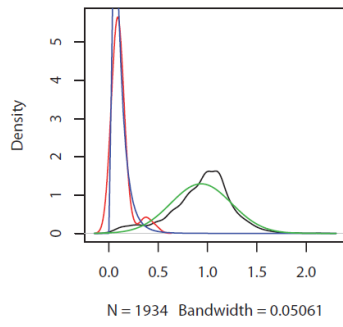

E190

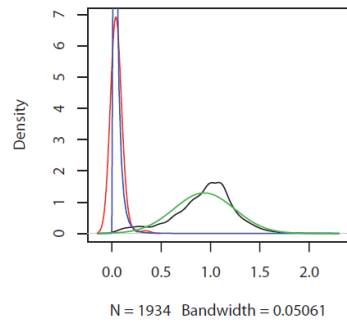

G190

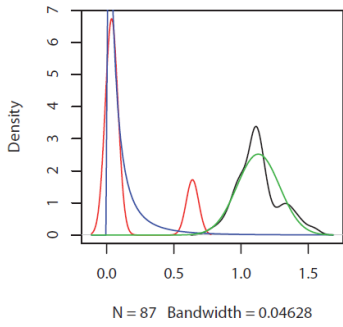

Q190

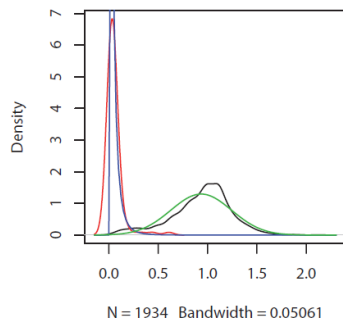

S190

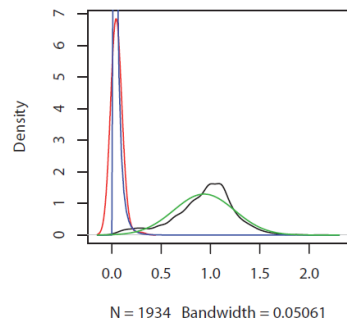

T190

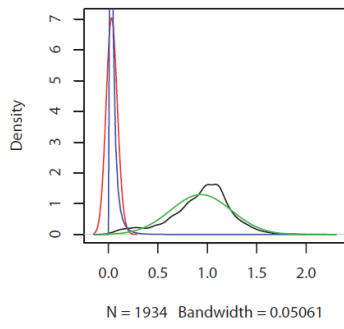

W210-2

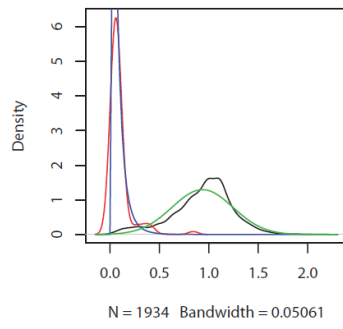

K211-2

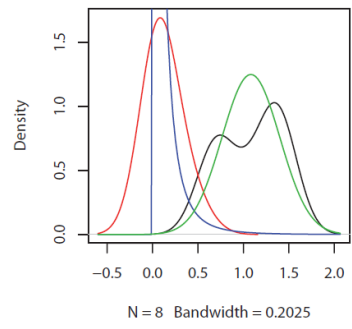

R211-2

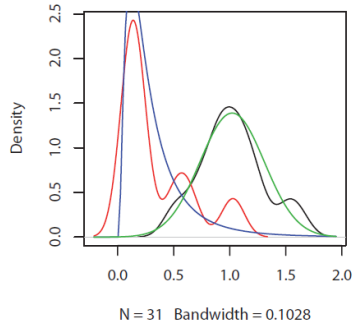

C215-2

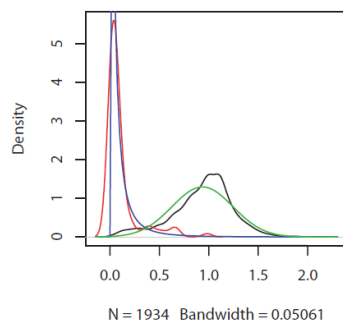

F215-2

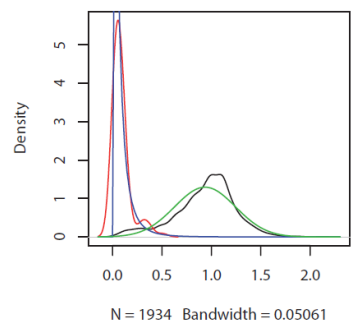

S215-2

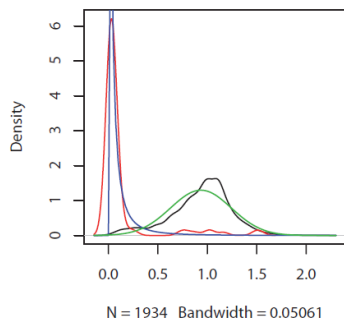

T215b-2

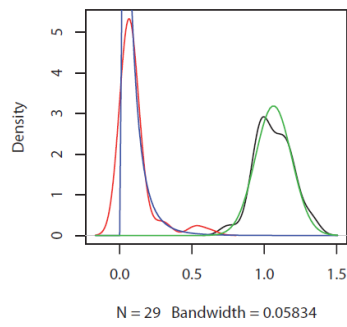

Y215-2

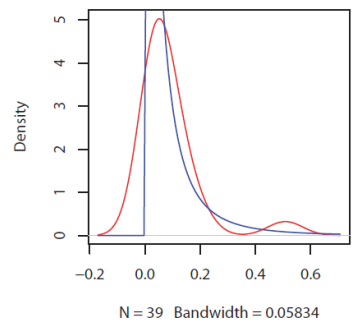

E219

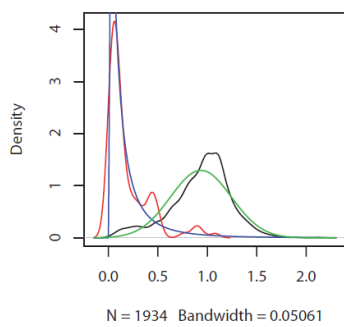

Q219

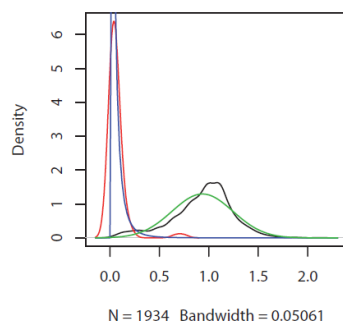

H225-2

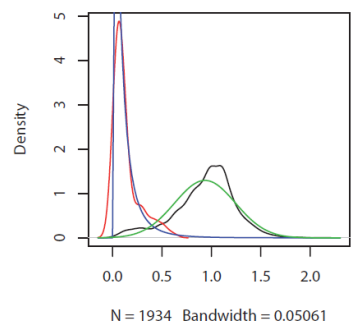

P225-2

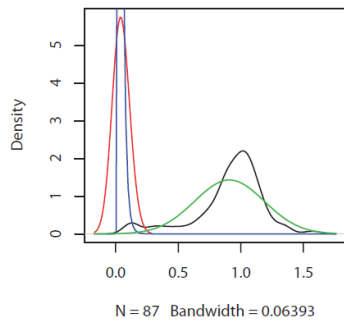

L230-3

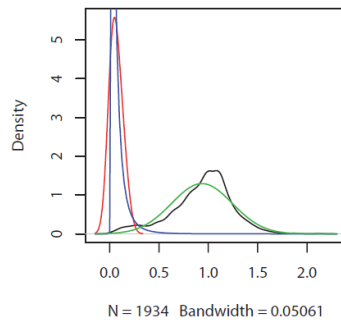

L236-2

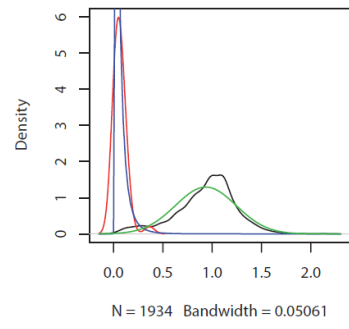

Q8-PR-2

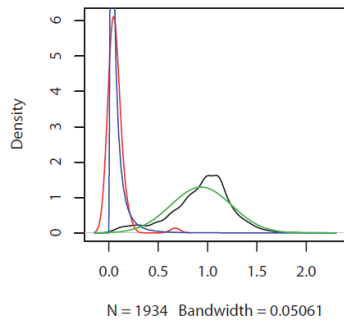

**Figure H. Classification accuracy for the pure clonal samples belonging to the training set.** Columns, probes included in the final version of the microarray that passed the quality control; Rows, samples hybridized to successive versions of the microarray. a) Hybridization of the PR region of the samples; b) Hybridization of the RT region; c) Hybridization of amplicons including both the PR and RT regions. Color code: Dark green, correctly classified signal (TP or TN); Dark red, FN signal; Red, FP signal; Black, UD signal; Light green, no data (due to spots discarded during the quality control or to the absence of certain probes in different versions of the microarray).

a)

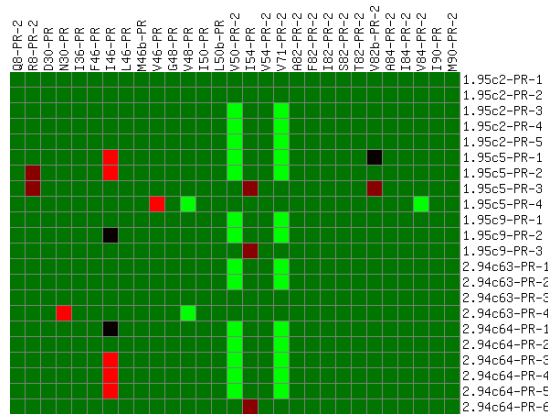

b)

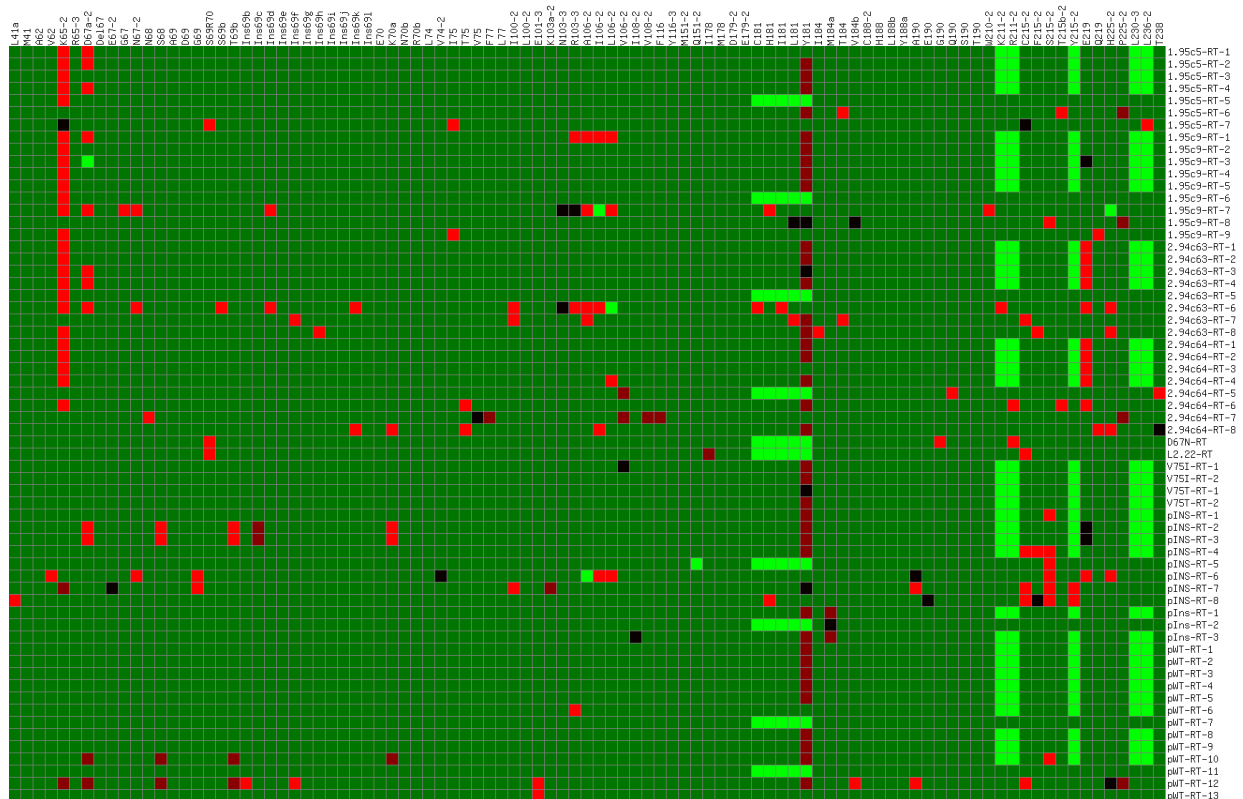

c)

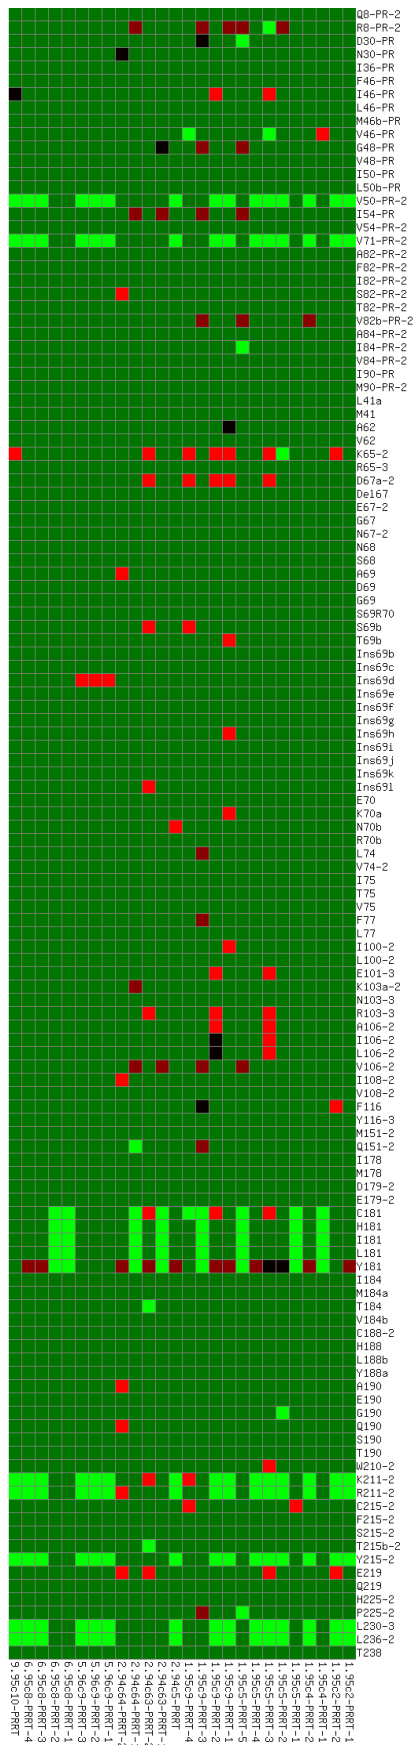



**Figure I. Accumulation of errors (FP+FN+UD) during classification of clinical samples.**

a) Errors per probe (bar: 11 to 20 errors); b) Errors per sample (bar: 10 to 22 errors). The remaining probes and hybridized samples showed a lower number of errors.

a)

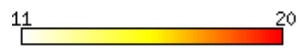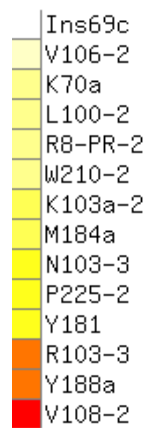

b)

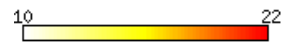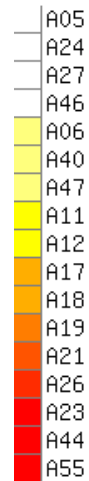

**Figure J. Theoretical hybridization tables of binary mixtures of clonal samples belonging to the training set.** a) Samples 1.95c9, 2.94c64 and their mixture; b) Samples pWT, pINS and their mixture. Color code: Green, expected hybridization; Red, not expected hybridization; Black, partial hybridization (one mismatch between probe and target is present at the 5' or 3' nucleotide of the hybridizing sequence).

a)

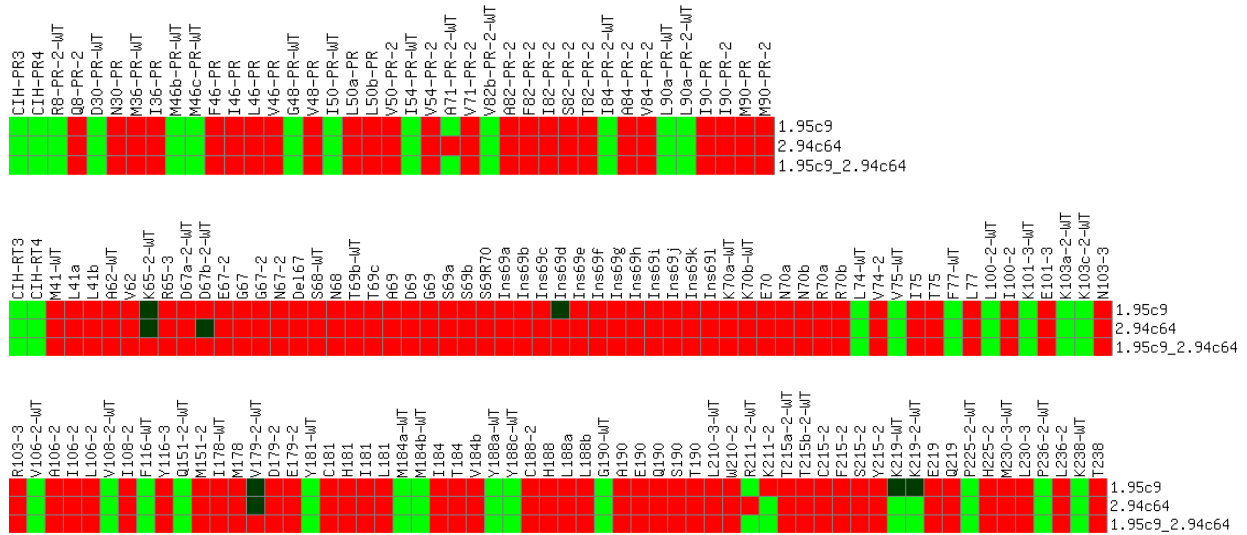

b)

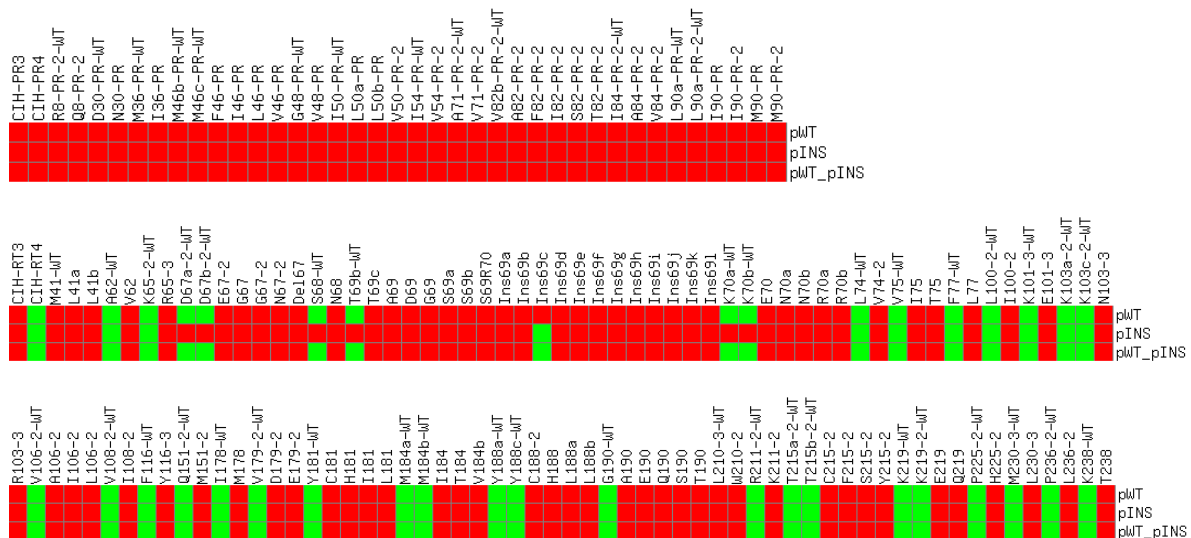

**Figure K. Proportion of variants present in the clinical samples of the test set, determined by clonal sequencing.** a) Probes of the PR region (columns) vs. sequences of the 53 target molecules that could be amplified out of the 57 clinical samples (rows). b) Probes of the RT region vs. sequences of the 51 amplified RT clinical samples. Bar: fraction of codons containing each queried codon within the quasiespecies. c) Distribution of variant proportions among the target samples.

a)

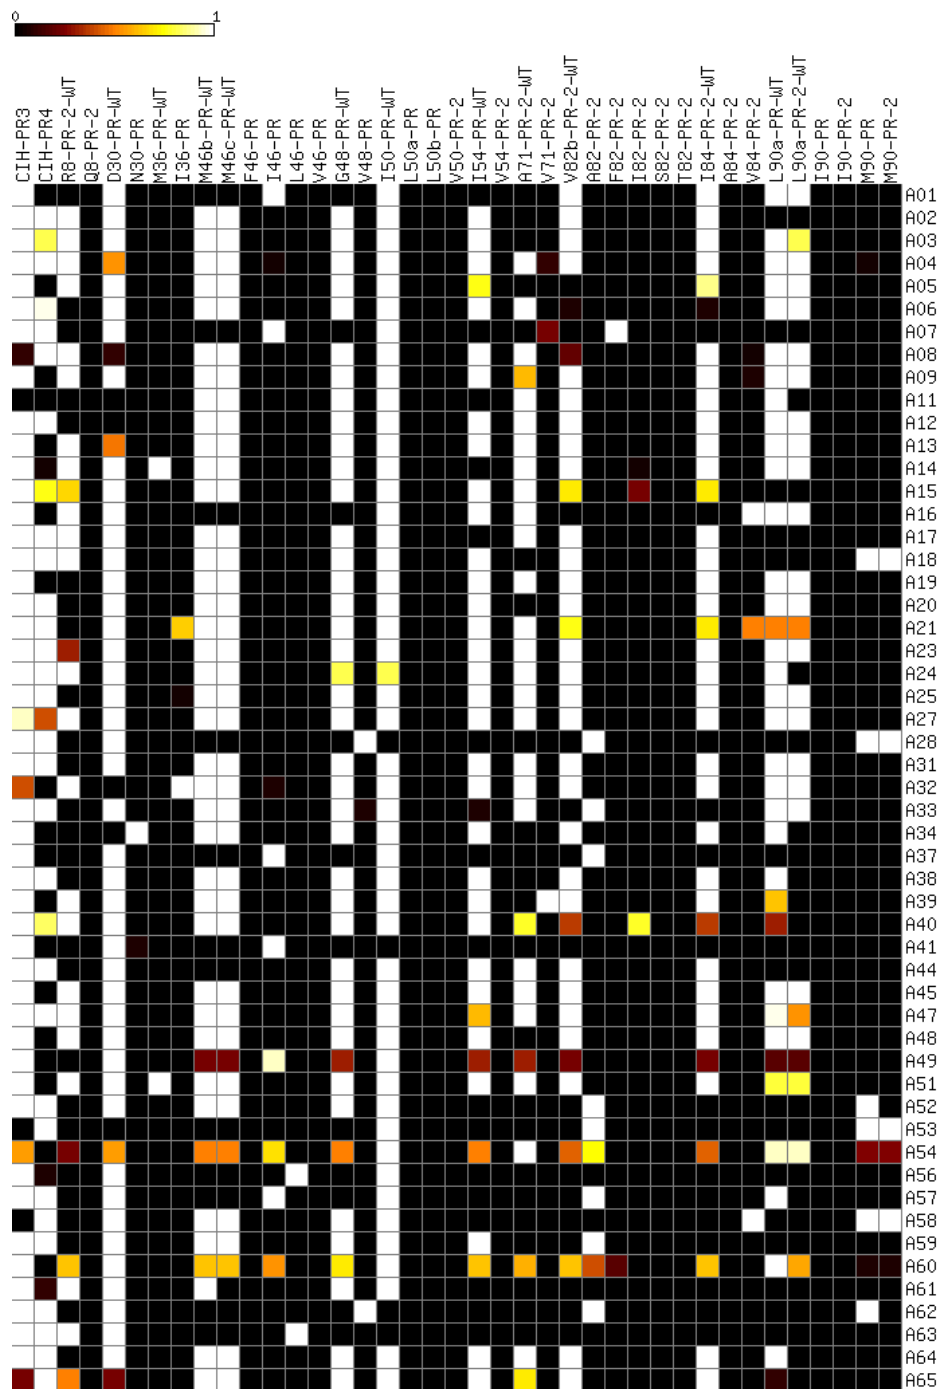

b)

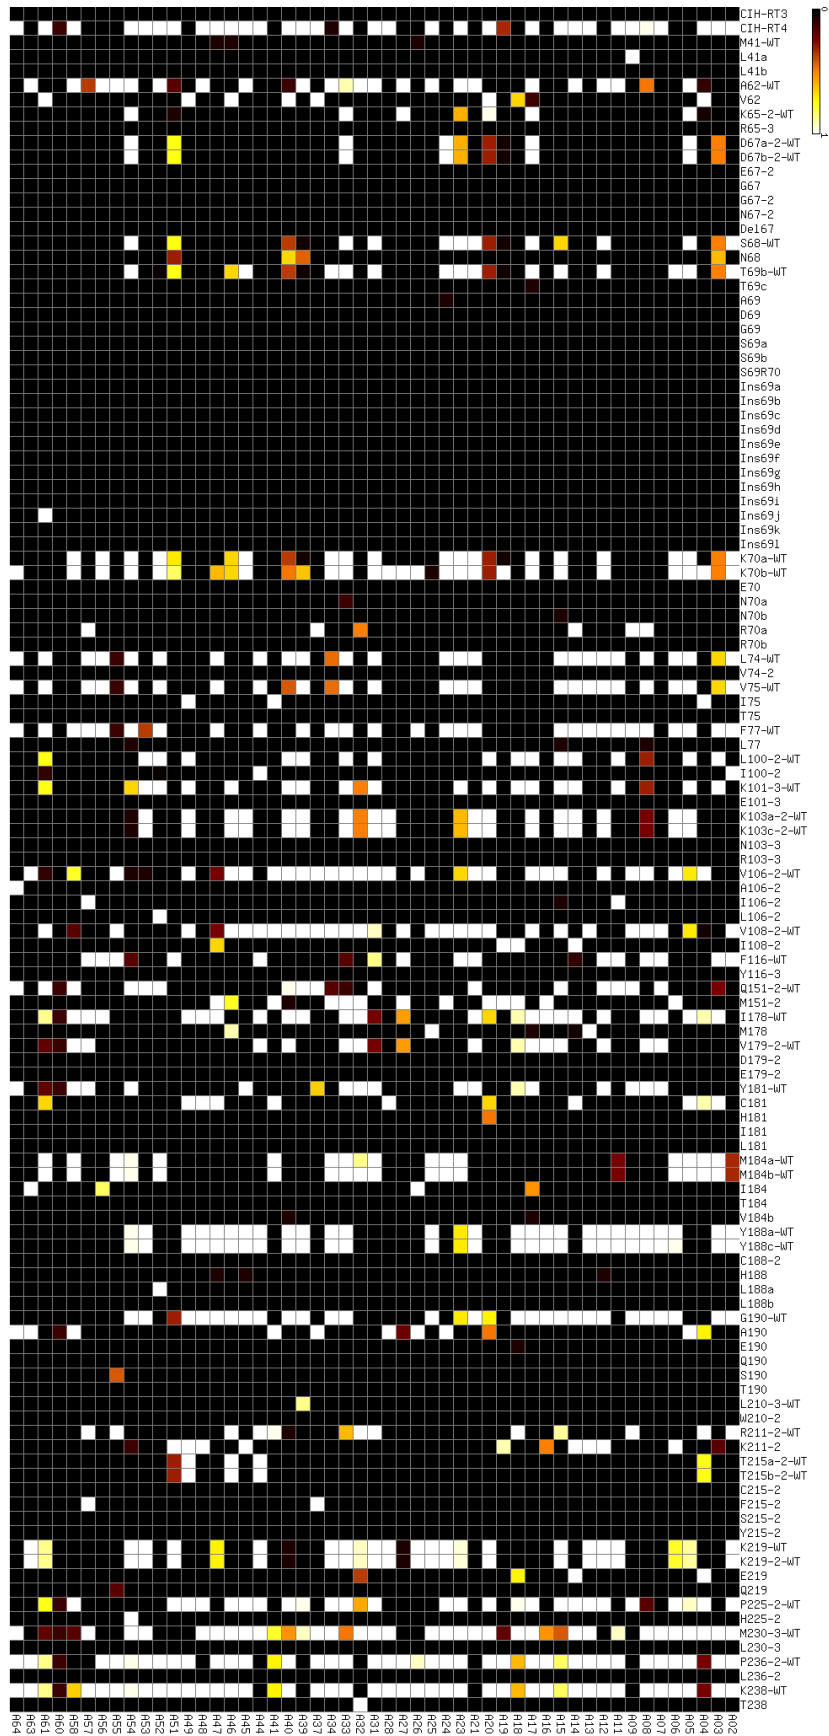

c)

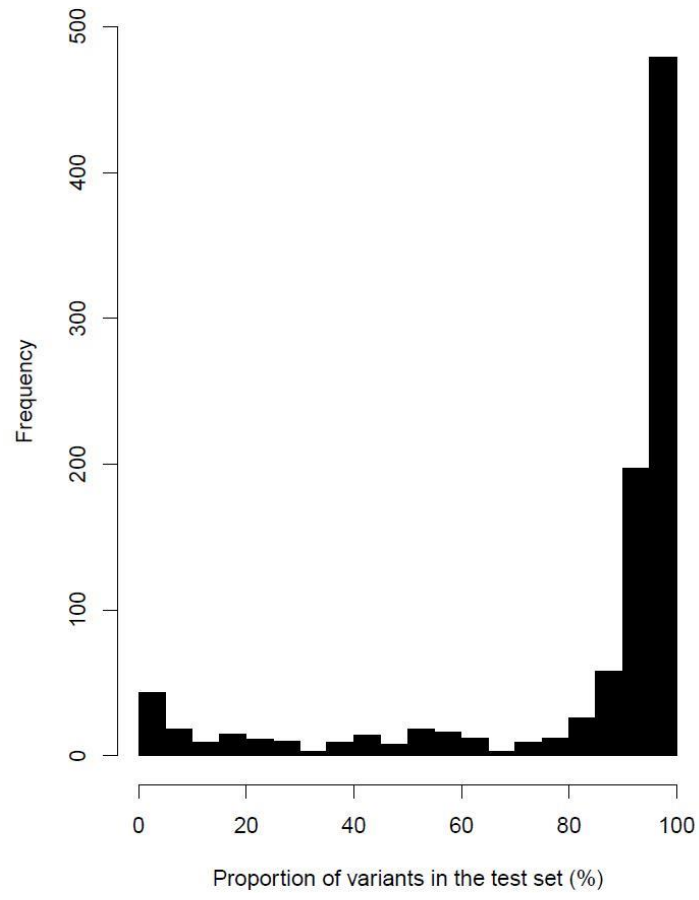

**Figure L. Theoretical hybridization tables of the test set, using a preliminary detection threshold of 10% for minority sequences.** Only perfect probe-target hybridizations are allowed. Columns, queried codons included in probes belonging to the PR (a) or RT (b) region; Rows, sequence of the quasiespecies of each clinical sample (see legend of Supp. Fig. S11). Color code: Green, expected hybridization (>10% of the clonal sequences of the sample match with the probe); Black, residual hybridization (probe matching in 5-10% of the sample clones); Red, not expected hybridization.

a)

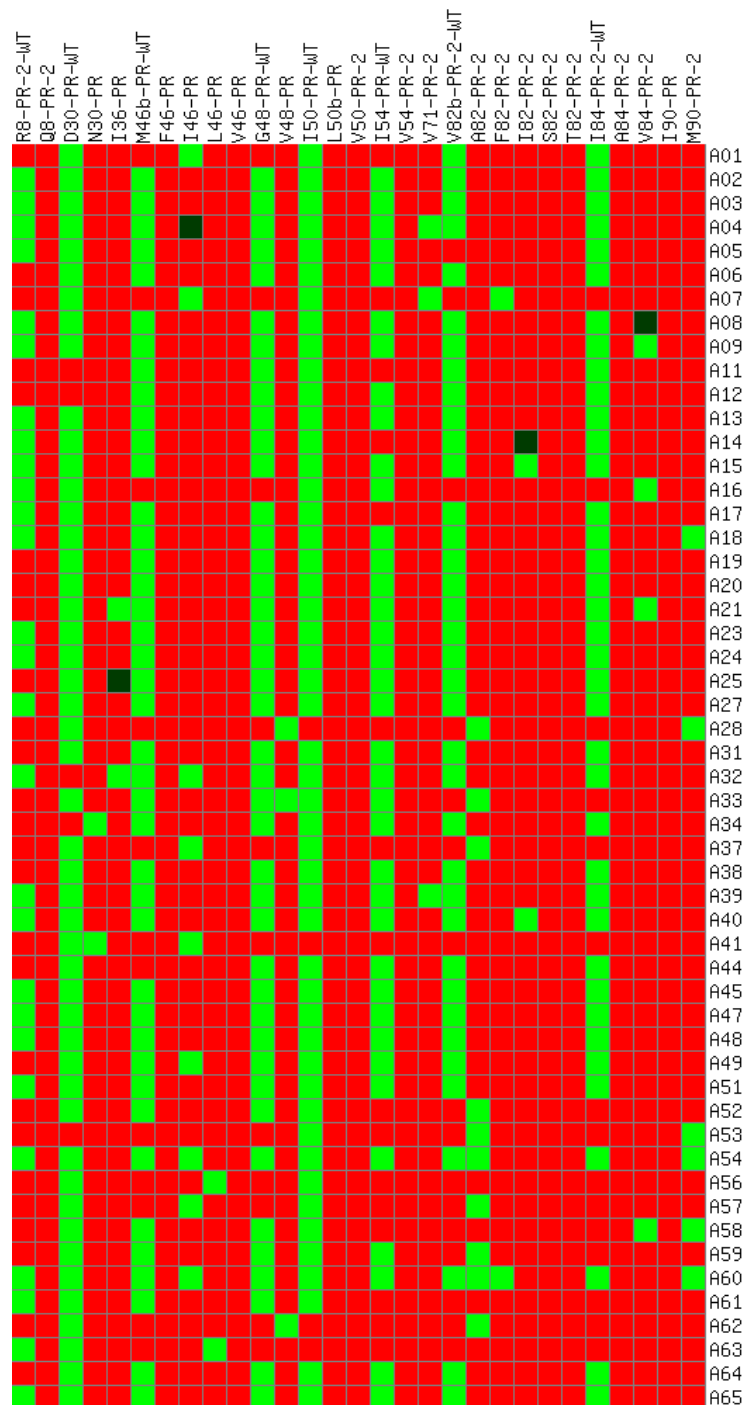

b)

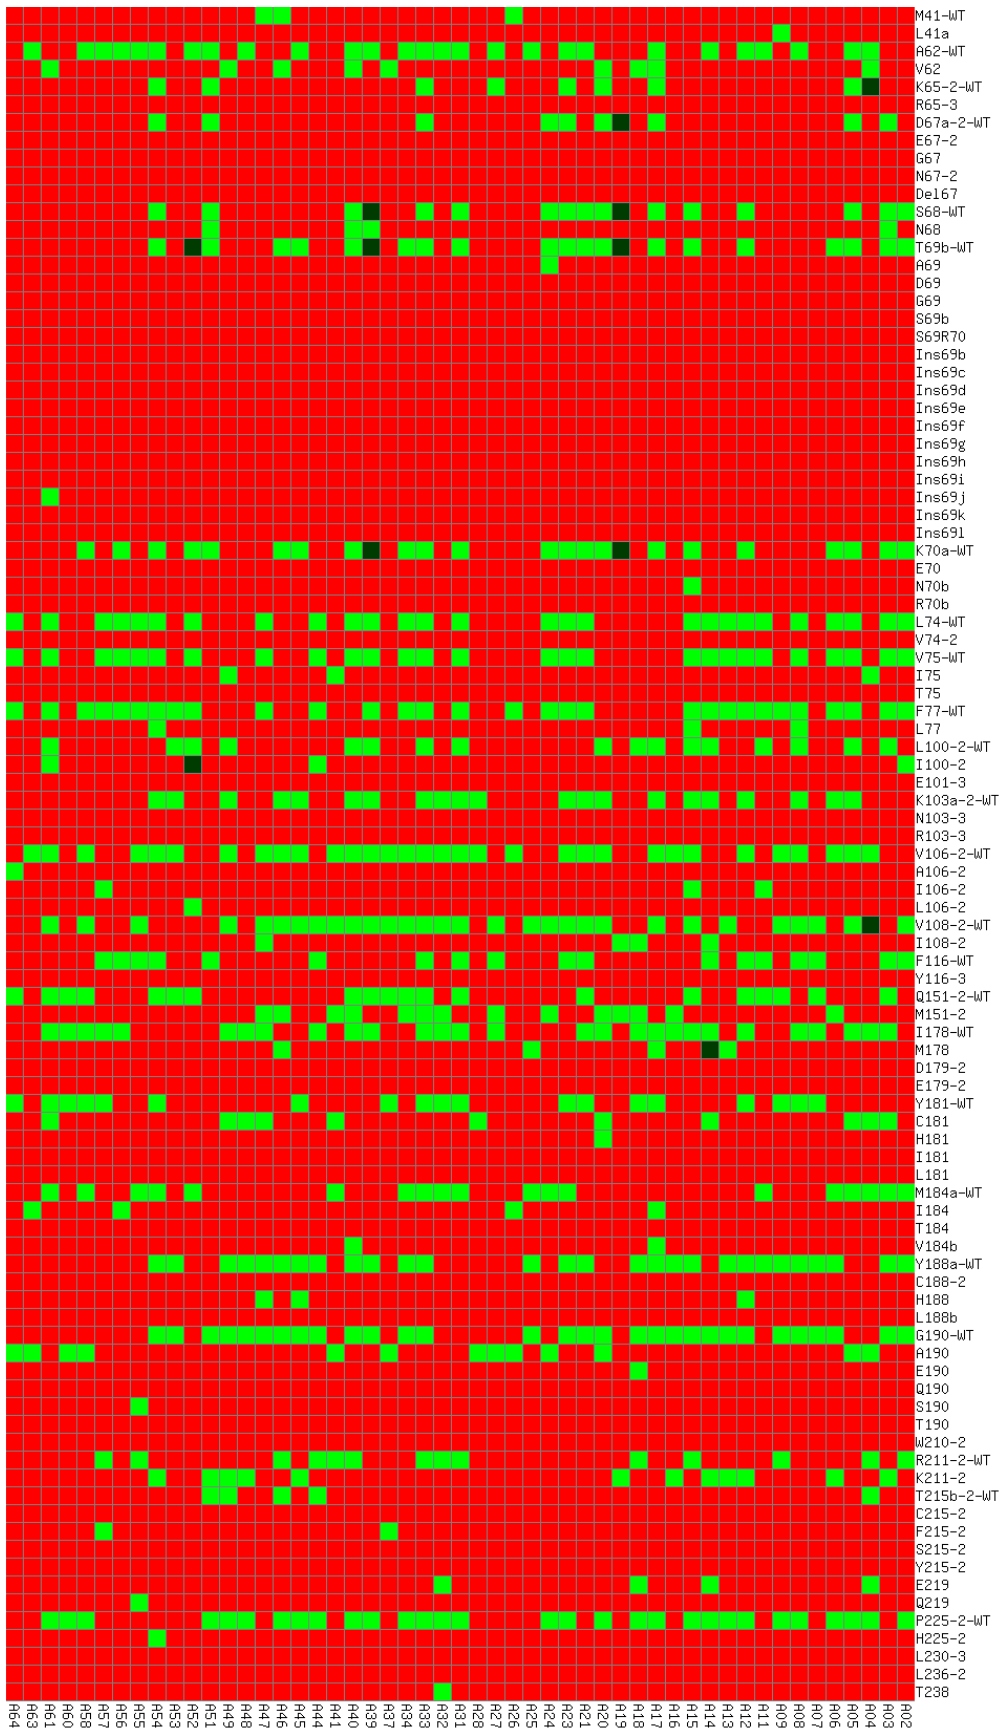

**Table A. Sequences of the oligonucleotide probes printed onto the microarray for the screening of HIV-1 PR and RT drug and multidrug-resistance mutations.** Discriminating probes are shown in black, positive HIV-1 internal hybridization controls (IHC-PR3, IHC-PR4, IHC-RT3 and IHC-RT4, spanning codons 25-29 and 94-99 of the PR, as well as 23-28 and 167-171 of the RT, respectively) are depicted in green, and negative controls (FMDV-G142-15r and FMDV-E142-15r, corresponding to sequences of the foot-and-mouth disease virus VP1 coding region) are shown in red. Yellow background highlights the probes complementary to wild type sequences at each queried codon. Two probes containing degenerated nucleotides (Ins69k and Ins69l) that could hybridize with a number of different targets showing 6 nt insertions between RT codons 69 and 70 have been included. The 124 highly performing probes that were maintained after the quality control protocol (see main text and Supp. Fig. S7) are underlined. In the second column, the nucleotide mutation(s) with respect to the corresponding wild type sequence are marked in bold. The calculated, salt-adjusted melting temperatures (quantified by means of the software available at <http://www.basic.northwestern.edu/biotools/oligocalc.html>) are shown.

| Oligo name       | Nucleotide sequence (5'-3')                | T <sub>m</sub> (°C) |
|------------------|--------------------------------------------|---------------------|
| <b>IHC-PR3</b>   | TTTTTTTTTTTTTTTTGATACAGGAGCAGAT            | 54                  |
| <b>IHC-PR4</b>   | TTTTTTTTTTTTTTTTGTTGCACTTTAAATTTT          | 51                  |
| <b>R8-PR-2</b>   | TTTTTTTTTTTTTTTTTGCAACGACCCCTC             | 55                  |
| <b>Q8-PR-2</b>   | TTTTTTTTTTTTTTTTTGCAAC <b>A</b> ACCCCTC    | 53                  |
| <b>D30-PR</b>    | TTTTTTTTTTTTTTTTTAGCAGATGATACAGT           | 51                  |
| <b>N30-PR</b>    | TTTTTTTTTTTTTTTTTAGCAGAT <b>A</b> AATACAGT | 49                  |
| <b>M36-PR</b>    | TTTTTTTTTTTTTTTTTAAGAAATGAGTTTGC           | 50                  |
| <b>I36-PR</b>    | TTTTTTTTTTTTTTTTTAAGAAAT <b>A</b> AGTTTGC  | 49                  |
| <b>M46b-PR</b>   | TTTTTTTTTTTTTTTTTCAAAAATGATAGGGG           | 51                  |
| <b>M46c-PR</b>   | TTTTTTTTTTTTTTTTTACCAAAAATGATAGG           | 49                  |
| <b>F46-PR</b>    | TTTTTTTTTTTTTTTTTCCAAAAT <b>T</b> CATAGGG  | 51                  |
| <b>I46-PR</b>    | TTTTTTTTTTTTTTTTTCAAAAAT <b>A</b> ATAGGGG  | 49                  |
| <b>L46-PR</b>    | TTTTTTTTTTTTTTTTTACCAAAAT <b>T</b> GATAGG  | 49                  |
| <b>V46-PR</b>    | TTTTTTTTTTTTTTTTTACCAAAAT <b>G</b> TGATAGG | 51                  |
| <b>G48-PR</b>    | TTTTTTTTTTTTTTTTTATGATAGGGGAATT            | 51                  |
| <b>V48-PR</b>    | TTTTTTTTTTTTTTTTTATGATAG <b>T</b> GGGAATT  | 49                  |
| <b>I50-PR</b>    | TTTTTTTTTTTTTTTTTGGGGAATTGGAG              | 49                  |
| <b>L50a-PR</b>   | TTTTTTTTTTTTTTTTTGGGGA <b>T</b> TAGGAG     | 49                  |
| <b>L50b-PR</b>   | TTTTTTTTTTTTTTTTTGGGGA <b>C</b> TGGAG      | 49                  |
| <b>V50-PR-2</b>  | TTTTTTTTTTTTTTTTTGGTGA <b>G</b> TGGAG      | 49                  |
| <b>I54-PR</b>    | TTTTTTTTTTTTTTTTTAGGTTTTATCAAAGTA          | 49                  |
| <b>V54-PR-2</b>  | TTTTTTTTTTTTTTTTTAGGATT <b>G</b> TCAAAGTA  | 51                  |
| <b>A71-PR-2</b>  | TCCTCCTCCTCCTCCATAAAGCTATAGGTA             | 51                  |
| <b>V71-PR-2</b>  | TCCTCCTCCTCCTCCATAAAG <b>T</b> TATAGGTA    | 49                  |
| <b>V82b-PR-2</b> | TCCTCCTCCTCCTCCTACACCTGTCAACAT             | 51                  |
| <b>A82-PR-2</b>  | TCCTCCTCCTCCTCCACACCT <b>G</b> CCAACAT     | 52                  |
| <b>F82-PR-2</b>  | TCCTCCTCCTCCTCCTACAC <b>C</b> TTCAACAT     | 49                  |



|                  |                                                                                                |    |
|------------------|------------------------------------------------------------------------------------------------|----|
| <u>I82-PR-2</u>  | TCCTCCTCCTCCTCCTACACCT <b>A</b> TCAACAT                                                        | 49 |
| <u>S82-PR-2</u>  | TCCTCCTCCTCCTCCTACACCT <b>T</b> CCAACAT                                                        | 51 |
| <u>T82-PR-2</u>  | TCCTCCTCCTCCTCCTACACCT <b>A</b> CCAACAT                                                        | 51 |
| <b>I84-PR-2</b>  | TCCTCCTCCTCCTCCTGTCAACATAATTGG                                                                 | 49 |
| <u>A84-PR-2</u>  | TCCTCCTCCTCCTCCGTCAAC <b>G</b> CAATTGG                                                         | 52 |
| <u>V84-PR-2</u>  | TCCTCCTCCTCCTCCGTCAAC <b>G</b> TAATTGG                                                         | 49 |
| <b>L90a-PR</b>   | TTTTTTTTTTTTTTTTAATCTGTTGACTCAG                                                                | 51 |
| <b>L90a-PR-2</b> | TTTTTTTTTTTTTTTTAATCTGTTGACTCAGA                                                               | 54 |
| <u>I90-PR</u>    | TTTTTTTTTTTTTTTTAATCTG <b>A</b> TAACTCAG                                                       | 49 |
| <u>I90-PR-2</u>  | TTTTTTTTTTTTTTTTAATCTG <b>A</b> TAACTCAGA                                                      | 51 |
| <u>M90-PR</u>    | TTTTTTTTTTTTTTTTAAATCTG <b>A</b> TGACTCA                                                       | 49 |
| <u>M90-PR-2</u>  | TTTTTTTTTTTTTTTTAATCTG <b>A</b> TGACTCAGA                                                      | 54 |
| <hr/>            |                                                                                                |    |
| <b>IHC-RT3</b>   | TTTTTTTTTTTTTTTTATGGCCATTGACAGA                                                                | 54 |
| <b>IHC-RT4</b>   | TTTTTTTTTTTTTTTTATCTTAGAGCCTTTTA                                                               | 51 |
| <b>M41</b>       | TTTTTTTTTTTTTTTTTACAGAGATGGAAA                                                                 | 49 |
| <u>L41a</u>      | TTTTTTTTTTTTTTTTTACAGAG <b>T</b> GGAAA                                                         | 49 |
| <u>L41b</u>      | TTTTTTTTTTTTTTTTTACAGAG <b>C</b> TGGAAA                                                        | 51 |
| <b>A62</b>       | TTTTTTTTTTTTTTTTTAGTATTTGCCATAAAG                                                              | 51 |
| <u>V62</u>       | TTTTTTTTTTTTTTTTTAGTATTTG <b>T</b> CATAAAG                                                     | 49 |
| <b>K65-2</b>     | TCCTCCTCCTCCTCCCATAAAGAAAAAAGAC                                                                | 49 |
| <u>R65-3</u>     | TCCTCCTCCTCCTCCCATAAAG <b>A</b> ATAGAC                                                         | 51 |
| <b>D67a-2</b>    | TCCTCCTCCTCCTCCAAAAAAGACAGTACTA                                                                | 49 |
| <b>D67b-2</b>    | TCCTCCTCCTCCTCCGAAAAAAGACAGTACT                                                                | 51 |
| <u>E67-2</u>     | TCCTCCTCCTCCTCCAAAAAAG <b>A</b> AGTACTAA                                                       | 49 |
| <u>G67</u>       | TTTTTTTTTTTTTTTTTAAAAAAG <b>G</b> CAGTACTA                                                     | 51 |
| <u>G67-2</u>     | TCCTCCTCCTCCTCCAAAAAAG <b>G</b> CAGTACTA                                                       | 51 |
| <u>N67-2</u>     | TCCTCCTCCTCCTCCGAAAAA <b>A</b> ACAGTACT                                                        | 49 |
| <u>Del67</u>     | TTTTTTTTTTTTTTTTTAAAGAAAA <b>A</b> AGTACTAA                                                    | 49 |
| <b>S68</b>       | TTTTTTTTTTTTTTTTTAAAAGACAGTACTAAAT                                                             | 51 |
| <u>N68</u>       | TTTTTTTTTTTTTTTTTAAAAGACA <b>A</b> TACTAAAT                                                    | 49 |
| <b>T69b</b>      | TTTTTTTTTTTTTTTTTGACAGTACTAAATGG                                                               | 51 |
| <b>T69c</b>      | TTTTTTTTTTTTTTTTTGACAGTAC <b>A</b> AAATGG                                                      | 51 |
| <u>A69</u>       | TTTTTTTTTTTTTTTTTAGACAGT <b>G</b> CTAAATG                                                      | 51 |
| <u>D69</u>       | TTTTTTTTTTTTTTTTTGACAGT <b>G</b> AATAATGG                                                      | 51 |
| <u>G69</u>       | TTTTTTTTTTTTTTTTTGACAGT <b>G</b> GTAATG                                                        | 49 |
| <u>S69a</u>      | TTTTTTTTTTTTTTTTTGACAGT <b>A</b> GTAATGG                                                       | 51 |
| <u>S69b</u>      | TTTTTTTTTTTTTTTTTGACAGT <b>A</b> GAAAATGG                                                      | 51 |
| <u>S69R70</u>    | TTTTTTTTTTTTTTTTTACAGT <b>T</b> CTAGATGGA                                                      | 51 |
| <u>Ins69a</u>    | TTTTTTTTTTTTTTTTT <b>A</b> G <b>T</b> A <b>G</b> T <b>A</b> G <b>T</b> AGTAAAT                 | 49 |
| <u>Ins69b</u>    | TTTTTTTTTTTTTTTTT <b>G</b> T <b>T</b> C <b>T</b> A <b>G</b> T <b>T</b> C <b>T</b> AGAT         | 49 |
| <u>Ins69c</u>    | TTTTTTTTTTTTTTTTT <b>C</b> G <b>A</b> G <b>T</b> A <b>G</b> T <b>T</b> C <b>G</b> AAA          | 51 |
| <u>Ins69d</u>    | TTTTTTTTTTTTTTTTT <b>A</b> G <b>T</b> A <b>G</b> T <b>A</b> G <b>T</b> G <b>G</b> TAAA         | 49 |
| <u>Ins69e</u>    | TTTTTTTTTTTTTTTTT <b>A</b> G <b>T</b> G <b>G</b> T <b>A</b> G <b>A</b> T <b>G</b> G            | 49 |
| <u>Ins69f</u>    | TTTTTTTTTTTTTTTTT <b>A</b> G <b>T</b> A <b>G</b> T <b>A</b> G <b>C</b> G <b>C</b> TAAA         | 51 |
| <u>Ins69g</u>    | TTTTTTTTTTTTTTTTT <b>A</b> C <b>T</b> A <b>G</b> C <b>A</b> G <b>C</b> G <b>C</b> T <b>A</b>   | 51 |
| <u>Ins69h</u>    | TTTTTTTTTTTTTTTTT <b>A</b> G <b>T</b> A <b>G</b> T <b>A</b> G <b>A</b> G <b>C</b> AAAA         | 49 |
| <u>Ins69i</u>    | TTTTTTTTTTTTTTTTT <b>A</b> G <b>T</b> T <b>C</b> T <b>A</b> C <b>T</b> C <b>T</b> A <b>G</b> A | 51 |

|                |                                     |       |
|----------------|-------------------------------------|-------|
| <u>Ins69j</u>  | TTTTTTTTTTTTTTTTTAGTAGCGTGACTAAA    | 51    |
| <u>Ins69k</u>  | TTTTTTTTTTTTTTTTTAGTACTAGTDSTAAAT   | 49-51 |
| <u>Ins69l</u>  | TTTTTTTTTTTTTTTTTGTWSTAGTDSTARAT    | 46-51 |
| <b>K70a</b>    | TTTTTTTTTTTTTTTTTCAGTACTAAATGGAG    | 51    |
| <b>K70b</b>    | TTTTTTTTTTTTTTTTTGTACTAAATGGAGAA    | 49    |
| <u>E70</u>     | TTTTTTTTTTTTTTTTTCAGTACTGAATGGA     | 49    |
| <u>N70a</u>    | TTTTTTTTTTTTTTTTTGTACTAAATGGAGAA    | 49    |
| <u>N70b</u>    | TTTTTTTTTTTTTTTTTGTACTAACTGGAGAA    | 51    |
| <u>R70a</u>    | TTTTTTTTTTTTTTTTTAGTACTAGATGGAGA    | 51    |
| <u>R70b</u>    | TTTTTTTTTTTTTTTTTGTACTAGGTGGAG      | 51    |
| <b>L74</b>     | TTTTTTTTTTTTTTTTTGAGAAAATTAGTAGAT   | 49    |
| <u>V74-2</u>   | TTTTTTTTTTTTTTTTTGAGAATAGTAGTAGAT   | 51    |
| <b>V75</b>     | TTTTTTTTTTTTTTTTTGAAAATTAGTAGATTTTC | 51    |
| <u>I75</u>     | TTTTTTTTTTTTTTTTTGAAAATTAATAGATTTTC | 49    |
| <u>T75</u>     | TTTTTTTTTTTTTTTTTGAAAATTAACAGATTTTC | 51    |
| <b>F77</b>     | TTTTTTTTTTTTTTTTTAGTAGATTTTCAGAGA   | 49    |
| <u>L77</u>     | TTTTTTTTTTTTTTTTTAGTAGATCTCAGAGA    | 51    |
| <b>L100-2</b>  | TCCTCCTCCTCCTCCCGCAGGGTTAAAAAA      | 51    |
| <u>I100-2</u>  | TCCTCCTCCTCCTCCCGCAGGGATAAAAAA      | 51    |
| <b>K101-3</b>  | TCCTCCTCCTCCTCCGCAGGGTTAAAAAAGA     | 54    |
| <u>E101-3</u>  | TCCTCCTCCTCCTCCGCAGGGTTAGAAAAGA     | 54    |
| <b>K103a-2</b> | TCCTCCTCCTCCTCCAAAAAGAAAAAATCAGT    | 49    |
| <b>K103c-2</b> | TCCTCCTCCTCCTCCAAAAAGAAAAAATCAG     | 49    |
| <u>N103-3</u>  | TCCTCCTCCTCCTCCAAATAGAACAAATCAGT    | 51    |
| <u>R103-3</u>  | TCCTCCTCCTCCTCCAAATAGAGAAAATCAG     | 51    |
| <b>V106-2</b>  | TCCTCCTCCTCCTCCAAATCAGTAACAGTA      | 49    |
| <u>A106-2</u>  | TCCTCCTCCTCCTCCAAATCAGCAACAGTA      | 51    |
| <u>I106-2</u>  | TCCTCCTCCTCCTCCAAAAATCAATAACAGTA    | 49    |
| <u>L106-2</u>  | TCCTCCTCCTCCTCCAAAAATCATTAACAGTA    | 49    |
| <b>V108-2</b>  | TTTTTTTTTTTTTTTTTCAGTAACAGTACTGG    | 54    |
| <u>I108-2</u>  | TTTTTTTTTTTTTTTTTCAGTAACAATACTGG    | 51    |
| <b>F116</b>    | TTTTTTTTTTTTTTTTTGCATATTTTTCAGTTC   | 51    |
| <u>Y116-3</u>  | TTTTTTTTTTTTTTTTTGCATATTAATCACTTC   | 51    |
| <b>Q151-2</b>  | TTTTTTTTTTTTTTTTTGCTTCCACAGGGAT     | 55    |
| <u>M151-2</u>  | TTTTTTTTTTTTTTTTTGCTTCCAATGGGAT     | 52    |
| <b>I178</b>    | TTTTTTTTTTTTTTTTTCAGACATAGTTATCT    | 49    |
| <u>M178</u>    | TTTTTTTTTTTTTTTTTCAGACATGGTTATCT    | 51    |
| <b>V179-2</b>  | TTTTTTTTTTTTTTTTTAGACATAGTTATCTATC  | 53    |
| <u>D179-2</u>  | TTTTTTTTTTTTTTTTTAGACATAGATATCTATC  | 53    |
| <u>E179-2</u>  | TTTTTTTTTTTTTTTTTAGACATAGAGATCTAT   | 51    |
| <b>Y181</b>    | TTTTTTTTTTTTTTTTTAGTTATCTATCAATAC   | 49    |
| <u>C181</u>    | TTTTTTTTTTTTTTTTTAGTTATCTGTCAATAC   | 51    |
| <u>H181</u>    | TTTTTTTTTTTTTTTTTAGTTATCCATCAATAC   | 51    |
| <u>I181</u>    | TTTTTTTTTTTTTTTTTAGTTATCATCAATAC    | 49    |
| <u>L181</u>    | TTTTTTTTTTTTTTTTTAGTTATCCTCAATAC    | 51    |
| <b>M184a</b>   | TTTTTTTTTTTTTTTTTCAATACATGGATGATT   | 51    |
| <b>M184b</b>   | TTTTTTTTTTTTTTTTTCAATACATGGATGAT    | 49    |

|                      |                                                  |           |
|----------------------|--------------------------------------------------|-----------|
| <u>I184</u>          | TTTTTTTTTTTTTTTCAATACAT <b>A</b> GATGATT         | 49        |
| <u>T184</u>          | TTTTTTTTTTTTTTTCAATACAC <b>G</b> GATGAT          | 51        |
| <u>V184b</u>         | TTTTTTTTTTTTTTTCAATAC <b>G</b> T <b>A</b> GATGAT | 49        |
| <u>Y188a</u>         | TTTTTTTTTTTTTTTGATTTGTATGTAGGA                   | 49        |
| <u>Y188c</u>         | TTTTTTTTTTTTTTTGATTTGTATGTAGGAT                  | 51        |
| <u>C188-2</u>        | TTTTTTTTTTTTTTTGATTAGT <b>G</b> TGTAGGA          | 51        |
| <u>H188</u>          | TTTTTTTTTTTTTTTGATTT <b>G</b> CATGTAGG           | 51        |
| <u>L188a</u>         | TTTTTTTTTTTTTTTGATTTGT <b>T</b> AGTAGGAT         | 51        |
| <u>L188b</u>         | TTTTTTTTTTTTTTTGATTT <b>G</b> C <b>T</b> TGTAGG  | 51        |
| <u>G190</u>          | TTTTTTTTTTTTTTTATGTAGGATCTGAC                    | 51        |
| <u>A190</u>          | TTTTTTTTTTTTTTTATGTAG <b>C</b> ATCTGAC           | 51        |
| <u>E190</u>          | TTTTTTTTTTTTTTTATGTAG <b>A</b> ATCTGAC           | 49        |
| <u>Q190</u>          | TTTTTTTTTTTTTTTATGTAC <b>A</b> ATCTGAC           | 49        |
| <u>S190</u>          | TTTTTTTTTTTTTTTATGT <b>A</b> AGCTCTGAC           | 51        |
| <u>T190</u>          | TTTTTTTTTTTTTTTATGTAA <b>C</b> ATCTGAC           | 49        |
| <u>L210-3</u>        | TTTTTTTTTTTTTTTATCTGTTGAGTTGGG                   | 54        |
| <u>W210-2</u>        | TTTTTTTTTTTTTTTATCTGT <b>G</b> GAGTTGG           | 52        |
| <u>R211-2</u>        | TTTTTTTTTTTTTTTGTTGAGGTGGGGA                     | 53        |
| <u>K211-2</u>        | TTTTTTTTTTTTTTTGTTGA <b>A</b> GTGGGGA            | 51        |
| <u>T215a-2</u>       | TTTTTTTTTTTTTTTGGACTTACCACACC                    | 55        |
| <u>T215b-2</u>       | TTTTTTTTTTTTTTTGGGACTTACCACAC                    | 55        |
| <u>C215-2</u>        | TTTTTTTTTTTTTTTGGACTT <b>T</b> GCACACC           | 55        |
| <u>F215-2</u>        | TTTTTTTTTTTTTTTGGACTT <b>T</b> T <b>C</b> ACACC  | 52        |
| <u>S215-2</u>        | TTTTTTTTTTTTTTTGGGACTT <b>T</b> CCACAC           | 55        |
| <u>Y215-2</u>        | TTTTTTTTTTTTTTTGGACTT <b>T</b> ACACACC           | 52        |
| <u>K219</u>          | TTTTTTTTTTTTTTTACCAGACAAAAACA                    | 49        |
| <u>K219-2</u>        | TCCTCCTCCTCCTCCACCAGACAAAAACA                    | 49        |
| <u>E219</u>          | TTTTTTTTTTTTTTTACCAGAC <b>G</b> AAAAACA          | 51        |
| <u>Q219</u>          | TTTTTTTTTTTTTTTACCAGAC <b>C</b> AAAAACA          | 51        |
| <u>P225-2</u>        | TCCTCCTCCTCCTCCAAGAACCTCCATTC                    | 51        |
| <u>H225-2</u>        | TCCTCCTCCTCCTCCAAGAAC <b>A</b> TCCATTC           | 49        |
| <u>M230-3</u>        | TTTTTTTTTTTTTTTCTTTGGATGGGTTAT                   | 51        |
| <u>L230-3</u>        | TTTTTTTTTTTTTTTCTTTG <b>C</b> TGGGTTAT           | 54        |
| <u>P236-2</u>        | TCCTCCTCCTCCTCCCTCCATCCTGATAAAT                  | 54        |
| <u>L236-2</u>        | TCCTCCTCCTCCTCCCTCCAT <b>C</b> TGATAAAT          | 51        |
| <u>K238</u>          | TTTTTTTTTTTTTTTCTGATAAATGGAC                     | 49        |
| <u>T238</u>          | TTTTTTTTTTTTTTTCTGATA <b>C</b> ATGGAC            | 51        |
| <b>FMDV-G142-15r</b> | <b>TTTTTTTTTTTTTTTCAAATCCCCGCGTG</b>             | <b>56</b> |
| <b>FMDV-E142-15r</b> | <b>TTTTTTTTTTTTTTTCAAATCCTCGCGTG</b>             | <b>54</b> |

**Table B. Classification accuracy of binary mixtures of pure clonal samples used to set the preliminary detection limit of the microarray.** Step 4 did not increase the accuracy in this series of experiments because none of the full hybridized microarrays had to be discarded.

| Signals | Classification accuracy (% of signals) after filtering |                      |                                           |                      |                                             |                      |                                         |                      |
|---------|--------------------------------------------------------|----------------------|-------------------------------------------|----------------------|---------------------------------------------|----------------------|-----------------------------------------|----------------------|
|         | Step 1:<br>Spot filter                                 |                      | Step 2:<br>Probe filter 1<br>(overlapped) |                      | Step 3:<br>Probe filter 2<br>(duplications) |                      | Step 4:<br>Array filter                 |                      |
|         | 1.95c9/<br>2.94c64<br>(RT and<br>PR-RT)                | pWT/<br>pINS<br>(RT) | 1.95c9/<br>2.94c64<br>(RT and<br>PR-RT)   | pWT/<br>pINS<br>(RT) | 1.95c9/<br>2.94c64<br>(RT and<br>PR-RT)     | pWT/<br>pINS<br>(RT) | 1.95c9/<br>2.94c64<br>(RT and<br>PR-RT) | pWT/<br>pINS<br>(RT) |
| Correct | 95.32                                                  | 91.15                | 97.80                                     | 93.08                | 97.64                                       | 94.26                | 97.64                                   | 94.26                |
| FP      | 2.61                                                   | 3.35                 | 1.37                                      | 2.13                 | 1.50                                        | 1.44                 | 1.50                                    | 1.44                 |
| FN      | 1.44                                                   | 4.77                 | 0.49                                      | 3.93                 | 0.54                                        | 3.36                 | 0.54                                    | 3.36                 |
| UD      | 0.62                                                   | 0.73                 | 0.34                                      | 0.86                 | 0.32                                        | 0.93                 | 0.32                                    | 0.93                 |

**Table C. Minority subpopulations present in the clinical samples of the test set, quantified by means of clonal analysis.**

| Range of minority variants within the quasispecies (%) | Fraction of positions (PR + RT) |
|--------------------------------------------------------|---------------------------------|
| 1.00 – 4.99                                            | 15/970 (1.55%)                  |
| 5.00 – 9.99                                            | 34/970 (3.50%)                  |
| 10.00 – 19.99                                          | 24/970 (2.47%)                  |
